# Supplementary material
Source: PubMed Central journal article supplement (PMC6441633)
Supplement: NIHMS1516580-supplement-1.pdf [file NIHMS1516580-supplement-1.pdf]

## **Supplementary Methods**

### **qRT-PCR validation**

Total RNA from the normal squamous tissue of the 12 AA and 12 EA examined by ST 2.1 array, as well as additional normal squamous tissue from 9 AA and 9 EA were then used for real-time (qRT-PCR) validation of selected gene transcripts. Isolated RNA was converted to cDNA and used for qRT-PCR as previously described<sup>1</sup>. Primers for qRT-PCR reactions were designed using Primer-BLAST<sup>2</sup> (*GSTT2*: primers for cDNA Exons 1-2 5'-TGGGCCTAGAGCTGTTTCTT-3', 3'-CCAGGCTGTTGATCTGCAAG-5' and *GSTT1* primers for cDNA 5'-CTGGAGTTTGCTGACTCCCTC-3', 3'-GCTCGAAGGGAATGTCGTTCT-5') or previously published (*GAPDH* and/or *B-Actin*)<sup>3</sup>. Optimal annealing temperatures and reaction conditions were confirmed using the Cepheid SmartCycler (Cepheid, Sunnyvale, CA). Samples were run in duplicate using the ABI PRISM® 7900HT Sequence Detection System (Thermo Fisher, Waltham, MA) according to the manufacturer's instructions. Thermal cycling conditions consisted of 10min of initial denaturation at 95°C, and 40 cycles of 15sec of denaturation at 95°C, and 1min of annealing/extension at 60°C. One AA:NE sample failed to amplify for *GSTT2* PCR primers. Relative expression and fold-change of the genes of interest (*GSTT2* and *GSTT1*) were calculated by the  $\Delta\Delta$ -Ct method (subtracted the average of the Ct's for the reference gene *ACTB* from the Ct values of each target gene)<sup>4</sup>.

### ***GSTT2B* deletion genotype detection**

Using DNeasy Blood & Tissue Kit (Qiagen, Valencia, CA), DNA was extracted from cell lines following the manufacturer's instructions. Normal squamous biopsy genomic DNA was extracted as described previously with modifications<sup>5</sup>. The *GSTT2B* genotype was determined using a three-primer set for PCR as previously described<sup>6</sup>. The PCR reaction contained a total volume of 50 $\mu$ l and consisted of 25 $\mu$ l of GoTaq Green Master Mix (Promega, Madison, WI), 10pmol of primers *GSTT2B*-6858 and *GSTT2B*-2B, 15pmol of primer *GSTT2B*-6857, and 25ng genomic DNA. The thermal cycling conditions for the reaction consisted of initial denaturation for 2min at 95°C, followed by 35 cycles of 30sec of denaturation at 95°C, 30sec of annealing at 60°C, and 45sec of extension at 72°C. PCR products were then separated on 2% agarose gels (Fisher) with ethidium bromide by electrophoresis in 1X TBE buffer with 100bp DNA ladder (Thermo Fisher) as a marker.

### ***GSTT2/2B* promoter genotype resolution and sequencing verification**

The primers and PCR protocol from Marotta *et al*<sup>7</sup> was used to genotype the 17bp promoter duplication status. PCR products were loaded on 2% agarose gel (Fisher) and run overnight (>18hrs) at 20V to provide adequate resolution of resulting alleles (17 bp distinction between ~320bp products). Two examples of each promoter genotype were chosen for sequencing-based confirmation. PCR products were purified using

Qiaquick (Qiagen) columns as per manufacturer's instructions and submitted to the University of Michigan Sequencing Core for Sanger sequencing using the reverse primer. Resulting sequence reads were aligned using Geneious software (version 5.4.6; Biomatters Ltd, Auckland, New Zealand) and manually to match 17bp genotypes to qPCR results.

### **Cumene-hydroperoxide (cum-OOH) treatment of Het-1A and HeLa Cell line**

Het-1A (an immortalized cell line from normal esophageal squamous mucosa) and HeLa (immortalized cell line from cervical cancer) were cultured in Dulbecco's Modified Eagle's Medium (DMEM) (Cat. No. 11965092) with 10% fetal bovine serum and 1% antibiotic-antiseptic. Cells were plated in 35mm x 10mm polystyrene plates (# 430165) (Corning Incorporated, NY) with 4 coverslips (6mm) within the plate, at a starting number of 120,000 cells per plate. Plates and coverslips were prepared to ensure enough coverslips for duplicates for all experimental conditions. For knockdown of *GSTT2*, four siRNAs (siRNA-05 GCUAAGGAUGGUGAUUUC; siRNA-06 GCACCGUGGAUUUGGUCAA; siRNA-07 AGGCUAUGCUGCUUCGAAU, siRNA-08 GACACUGGCUGAUCUCAUG; (#LQ-011181-00-0005, Dharmacon, Lafayette, CO) directed at *GSTT2* were used at a concentration of 10nm. For controls, we used a non-target (NT) siRNA (10nm), as well as treated cells with only OPTI-MEM plus RNAimax (mock control) (Thermo Fisher). Cells were plated and transfected using Lipofectamine® RNAiMAX Transfection Reagent (as directed by RNAiMAX protocol, Cat. No. 13778030 (Thermo Fisher) on day 1, with the following groups: mock, NT, si05, si06, si07, and si08. On day 2, the media was changed and cells were transfected a second time. On day 3, the media and cell were incubated for 48hrs. After 48hrs, coverslips were transferred to randomly assigned wells in 24-well plates and cells were then treated with either 0 $\mu$ M or 100 $\mu$ M of cumene hydroperoxide (cum-OOH) (#247502; Sigma-Aldrich, St. Louis, MO) for 1hr. Experimental conditions were organized with each condition present on a plate such that there were duplicated 24 well plates representing the whole experiment. After treatment, the cells were fixed for 20min at -20 °C using 100% cold methanol, washed with PBS (3 x 5min) and allowed to stand in fresh PBS at 4°C before their use in the immunofluorescence protocol.

### **Immunofluorescence analysis of $\gamma$ -H2AX**

PBS was removed from the fixed samples and the protein-DNA was cross-linked with 500 $\mu$ L of 10% phosphate-buffered formalin for 20min at room temperature (RT). Cells were washed once with 500 $\mu$ L TBS followed by permeabilization with 100% cold methanol (-20°C) then incubated for 1hr in a blocking buffer containing 5% goat serum, 1% BSA, and 0.2% Triton x100 in TBS (500 $\mu$ l of blocking buffer per well). We diluted each primary antibody ( $\gamma$ -H2AX 1:1500 (#05-636, Millipore) *GSTT2*-1:500 (#514667, Santa Cruz) in TBS with 1% BSA such that 150 $\mu$ L was used for each cover glass and allowed to incubate on the cells overnight at 4 °C in a humidified chamber. The following day cells were washed 3 times with TBS-T for 5min. The cells were then incubated with secondary antibody for 1hr at room temperature (1:500

Alexa Fluor 488 goat anti-mouse IgG1, #A21121, Life Technologies; 1:200 Alexa Fluor 594 goat anti-mouse IgG2a, #A21135, Life Technologies), in 1% BSA, followed by three 5min washes with TBS-T. Coverslips were mounted onto slides using DAPI mounting solution (# P36935, Thermo Fisher) and stored at -20°C prior to microscopic and photographic imaging. For  $\gamma$ -H2AX response quantitation, each coverslip was conceptually cordoned into 3 quadrants, upper left, upper right and lower (left and right combined), with several high-resolution images (IX73:Inverted Microscope, Olympus, Life Science Solutions) taken to ensure that at least 50 DAPI stained nuclei were scored per quadrant. We chose to use the ratio of DNA repair active nuclei (>10  $\gamma$ -H2AX positive nuclear foci) verse DAPI stained nuclei as our DNA damage metric. These per quadrant ratios were averaged and replicate plate averages were in-turn, averaged to provide per-experiment ratios for each experimental condition. The experiment was repeated twice, with the resulting daily averaged ratios considered as part of the 4-way ANOVA analysis model, along with terms for cum-OOH (0 vs 100uM), cell line (Het-1A vs HeLa) and knock down treatment (control, siRNA05, siRNA06). The ANOVA model used could be written as  $Y_{ijkm} = A_{ijk} + B_m + E_{ijkm}$ , where  $i$  is cell type,  $j$  is cum-OOH dose,  $k$  is treatment, and  $m$  is day, such that  $A_{ijk}$  represents the interaction between cell line, cum-OOH and KD treatment measures, the  $B_m$  term added a component to account for experimental (daily) variation and  $E_{ijkm}$  represents the random residual error across all components. Analyses were done via an Excel (Microsoft, Seattle) spreadsheet using the FDIST function. We generated at each between-group and difference of difference comparison  $P$  value, which we report without adjustment below. For simplicity, we chose to represent aspects of this comparison in three separate figures, such that **Figure 7(A and B)**, and **Supplementary Figure S7(I and J)** demonstrate the effect of Cum-OOH and GSTT2 siRNA knock down on squamous cell lines Het-1A and HeLa, respectively, while **Supplementary Figure S6(D)** compares the response of both cell lines to cum-OOH treatment, without the presence of GSTT2 specific siRNA. Between-experiment variation (term  $B_m$  above) proved to be a very minor determinant in between group comparison and showed minimal contributions to  $p$ -values. To determine this, we removed the  $B_m$  component from the model and compared the resulting two-group comparison  $P$ -values to the full model. A summary of ANOVA models and group comparison  $P$  values, with and without the between-experiment ( $B_m$ ) component are given below.

| Analysis summary of siRNA knockdown and cum-OOH treatment on $\gamma$ -H2AX response in Het-1A and HeLa                                                                                          |                                 |                      |          |             |                                 |         |         |         |         |         |                             |         |         |         |         |         |         |         |
|--------------------------------------------------------------------------------------------------------------------------------------------------------------------------------------------------|---------------------------------|----------------------|----------|-------------|---------------------------------|---------|---------|---------|---------|---------|-----------------------------|---------|---------|---------|---------|---------|---------|---------|
| Cu-OOH condition                                                                                                                                                                                 | experiment day 1 average ratios |                      |          |             | experiment day 2 average ratios |         |         |         |         |         | averages over the two days. |         |         |         |         |         |         |         |
|                                                                                                                                                                                                  | 0uM                             | 0uM                  | 0uM      | 100uM       | 100uM                           | 100uM   | 0uM     | 0uM     | 0uM     | 100uM   | 100uM                       | 100uM   | 0uM     | 0uM     | 0uM     | 100uM   | 100uM   | 100uM   |
| day                                                                                                                                                                                              | control                         | siRNA05              | siRNA06  | control     | siRNA05                         | siRNA06 | control | siRNA05 | siRNA06 | control | siRNA05                     | siRNA06 | control | siRNA05 | siRNA06 | control | siRNA05 | siRNA06 |
| HeLa                                                                                                                                                                                             | 0.014                           | 0.23                 | 0.11     | 0.11        | 0.69                            | 0.65    | 0.013   | 0.18    | 0.15    | 0.27    | 0.68                        | 0.75    | 0.013   | 0.21    | 0.13    | 0.19    | 0.69    | 0.70    |
| HeLa                                                                                                                                                                                             | 0.011                           | 0.19                 | 0.22     | 0.17        | 0.66                            | 0.55    | 0.040   | 0.30    | 0.11    | 0.18    | 0.44                        | 0.46    | 0.026   | 0.24    | 0.17    | 0.18    | 0.55    | 0.51    |
| 4-Way ANOVA - full model                                                                                                                                                                         |                                 |                      |          |             |                                 |         |         |         |         |         |                             |         |         |         |         |         |         |         |
| Full model is $Y_{ijkm} = A_{ijk} + B_m + E_{ijkm}$ , where i is cell type (Het-1A vs HeLa), j is Cu-OOH dose (0uM vs 100uM), k is treatment (control, siRNA05, siRNA06), and m is day (1 vs 2). |                                 |                      |          |             |                                 |         |         |         |         |         |                             |         |         |         |         |         |         |         |
| 3-Way ANOVA - no intra-day component                                                                                                                                                             |                                 |                      |          |             |                                 |         |         |         |         |         |                             |         |         |         |         |         |         |         |
| Model is $Y_{ijkm} = A_{ijk} + E_{ijkm}$ , where i is cell type (Het-1A vs HeLa), j is Cu-OOH dose (0uM vs 100uM), k is treatment (control, siRNA05, siRNA06).                                   |                                 |                      |          |             |                                 |         |         |         |         |         |                             |         |         |         |         |         |         |         |
| between group comparisons                                                                                                                                                                        | 4-way ANOVA P values            | 3-way ANOVA P values | % change | Fold change |                                 |         |         |         |         |         |                             |         |         |         |         |         |         |         |
| si05 vs control, 0uM, Het-1A                                                                                                                                                                     | 0.026                           | 0.020                | 19%      | 15.41       |                                 |         |         |         |         |         |                             |         |         |         |         |         |         |         |
| si06 vs control, 0uM, Het-1A                                                                                                                                                                     | 0.14                            | 0.13                 | 12%      | 9.84        |                                 |         |         |         |         |         |                             |         |         |         |         |         |         |         |
| si05 vs control, 0uM, HeLa                                                                                                                                                                       | 0.014                           | 0.010                | 22%      | 9.50        |                                 |         |         |         |         |         |                             |         |         |         |         |         |         |         |
| si06 vs control, 0uM, HeLa                                                                                                                                                                       | 0.087                           | 0.073                | 14%      | 6.51        |                                 |         |         |         |         |         |                             |         |         |         |         |         |         |         |
| si05 vs control, 100uM, Het-1A                                                                                                                                                                   | 3.93E-05                        | 1.70E-05             | 49%      | 3.54        |                                 |         |         |         |         |         |                             |         |         |         |         |         |         |         |
| si06 vs control, 100uM, Het-1A                                                                                                                                                                   | 2.92E-05                        | 1.23E-05             | 51%      | 3.63        |                                 |         |         |         |         |         |                             |         |         |         |         |         |         |         |
| si05 vs control, 100uM, HeLa                                                                                                                                                                     | 4.29E-04                        | 2.30E-04             | 37%      | 3.09        |                                 |         |         |         |         |         |                             |         |         |         |         |         |         |         |
| si06 vs control, 100uM, HeLa                                                                                                                                                                     | 1.06E-03                        | 6.13E-04             | 33%      | 2.86        |                                 |         |         |         |         |         |                             |         |         |         |         |         |         |         |
| si06 vs si05, 0uM, Het-1A                                                                                                                                                                        | 0.34                            | 0.32                 | -7%      | 0.64        |                                 |         |         |         |         |         |                             |         |         |         |         |         |         |         |
| si06 vs si05, 0uM, HeLa                                                                                                                                                                          | 0.33                            | 0.31                 | -8%      | 0.69        |                                 |         |         |         |         |         |                             |         |         |         |         |         |         |         |
| si06 vs si05, 100uM, Het-1A                                                                                                                                                                      | 0.83                            | 0.82                 | 2%       | 1.02        |                                 |         |         |         |         |         |                             |         |         |         |         |         |         |         |
| si06 vs si05, 100uM, HeLa                                                                                                                                                                        | 0.59                            | 0.57                 | -4%      | 0.92        |                                 |         |         |         |         |         |                             |         |         |         |         |         |         |         |
| 100 vs 0 uM, control, Het-1A                                                                                                                                                                     | 0.034                           | 0.027                | 18%      | 14.58       |                                 |         |         |         |         |         |                             |         |         |         |         |         |         |         |
| 100 vs 0 uM, control, HeLa                                                                                                                                                                       | 0.067                           | 0.056                | 15%      | 6.94        |                                 |         |         |         |         |         |                             |         |         |         |         |         |         |         |
| 100 vs 0 uM, si05, Het-1A                                                                                                                                                                        | 4.82E-05                        | 2.13E-05             | 48%      | 3.35        |                                 |         |         |         |         |         |                             |         |         |         |         |         |         |         |
| 100 vs 0 uM, si05, HeLa                                                                                                                                                                          | 1.80E-03                        | 1.09E-03             | 31%      | 2.26        |                                 |         |         |         |         |         |                             |         |         |         |         |         |         |         |
| 100 vs 0 uM, si06, Het-1A                                                                                                                                                                        | 9.96E-06                        | 3.81E-06             | 57%      | 5.37        |                                 |         |         |         |         |         |                             |         |         |         |         |         |         |         |
| 100 vs 0 uM, si06, HeLa                                                                                                                                                                          | 8.27E-04                        | 4.70E-04             | 34%      | 3.05        |                                 |         |         |         |         |         |                             |         |         |         |         |         |         |         |
| Het-1A vs HeLa, 0uM control                                                                                                                                                                      | 0.87                            | 0.87                 | -1%      | 0.52        |                                 |         |         |         |         |         |                             |         |         |         |         |         |         |         |
| Het-1A vs HeLa, 0uM siRNA05                                                                                                                                                                      | 0.62                            | 0.61                 | -4%      | 0.84        |                                 |         |         |         |         |         |                             |         |         |         |         |         |         |         |
| Het-1A vs HeLa, 0uM siRNA06                                                                                                                                                                      | 0.65                            | 0.63                 | -4%      | 0.79        |                                 |         |         |         |         |         |                             |         |         |         |         |         |         |         |
| Het-1A vs HeLa, 100uM control                                                                                                                                                                    | 0.83                            | 0.82                 | 2%       | 1.09        |                                 |         |         |         |         |         |                             |         |         |         |         |         |         |         |
| Het-1A vs HeLa, 100uM siRNA05                                                                                                                                                                    | 0.092                           | 0.080                | 14%      | 1.25        |                                 |         |         |         |         |         |                             |         |         |         |         |         |         |         |
| Het-1A vs HeLa, 100uM siRNA06                                                                                                                                                                    | 0.024                           | 0.019                | 20%      | 1.39        |                                 |         |         |         |         |         |                             |         |         |         |         |         |         |         |
| difference-of-differences                                                                                                                                                                        | 4-way ANOVA P values            | 3-way ANOVA P values |          |             |                                 |         |         |         |         |         |                             |         |         |         |         |         |         |         |
| si05 vs control, 0uM, Het-1A vs HeLa                                                                                                                                                             | 0.81                            | 0.81                 |          |             |                                 |         |         |         |         |         |                             |         |         |         |         |         |         |         |
| si06 vs control, 0uM, Het-1A vs HeLa                                                                                                                                                             | 0.83                            | 0.82                 |          |             |                                 |         |         |         |         |         |                             |         |         |         |         |         |         |         |
| si05 vs control, 100uM, Het-1A vs HeLa                                                                                                                                                           | 0.27                            | 0.25                 |          |             |                                 |         |         |         |         |         |                             |         |         |         |         |         |         |         |
| si06 vs control, 100uM, Het-1A vs HeLa                                                                                                                                                           | 0.12                            | 0.10                 |          |             |                                 |         |         |         |         |         |                             |         |         |         |         |         |         |         |
| 100 vs 0 uM, control, Het-1A vs HeLa                                                                                                                                                             | 0.79                            | 0.78                 |          |             |                                 |         |         |         |         |         |                             |         |         |         |         |         |         |         |
| 100 vs 0 uM, si05, Het-1A vs HeLa                                                                                                                                                                | 0.12                            | 0.11                 |          |             |                                 |         |         |         |         |         |                             |         |         |         |         |         |         |         |
| 100 vs 0 uM, si06, Het-1A vs HeLa                                                                                                                                                                | 0.051                           | 0.041                |          |             |                                 |         |         |         |         |         |                             |         |         |         |         |         |         |         |
| si05 vs control, 100 vs 0uM, Het-1A                                                                                                                                                              | 0.016                           | 0.012                |          |             |                                 |         |         |         |         |         |                             |         |         |         |         |         |         |         |
| si06 vs control, 100 vs 0uM, Het-1A                                                                                                                                                              | 3.48E-03                        | 2.24E-03             |          |             |                                 |         |         |         |         |         |                             |         |         |         |         |         |         |         |
| si05 vs control, 100 vs 0uM, HeLa                                                                                                                                                                | 0.17                            | 0.15                 |          |             |                                 |         |         |         |         |         |                             |         |         |         |         |         |         |         |
| si06 vs control, 100 vs 0uM, HeLa                                                                                                                                                                | 0.10                            | 0.087                |          |             |                                 |         |         |         |         |         |                             |         |         |         |         |         |         |         |

## Western blotting following cum-OOH treatment

Cells were incubated and plated as described above (Treatments cum-OOH section). After 1 PBS wash, 40 $\mu$ l of Cell Signaling protein lysis buffer (1X) with proteinase inhibitor cocktail (PIC) (20 $\mu$ l per mL) was added followed by scraping the plates. Cell lysates were transferred to 1.5mL tubes, spun for 20min at 4 $^{\circ}$ C and supernatant protein was quantified using protein assay. All Western lysates were prepared at 20 $\mu$ g total, with 20% 2-mercaptoethanol, and 4X sample buffer. Samples were resolved using SDS Novex gels (4-12% gradient) (Thermo Fisher) run for 2hrs at 125-126V. Nitrocellulose membranes were activated with 100% methanol for 1min and transfer was performed using Novex Transfer Buffer run overnight at 12V. After transfer, membranes were stained with Ponceau red for assessment of transfer efficiency. Blocking was performed by incubating the membranes in 5% milk/TBST or 5% BSA/TBST for 1hr at room temperature. Primary antibodies [GSTT2 (mouse monoclonal isotype IgG2a #514667; Santa Cruz, Dallas, TX);  $\gamma$ -H2AX (anti-phospho-histone H2AX (Ser139) isotype IgG1 #05-636; Millipore, Burlington, MA)] were diluted in

5% milk/TBST or 5% BSA/TBST and incubated over-night at 4°C. Membranes were then washed 3 times (5min per wash) with TBS-T. Secondary antibodies were diluted in 5% milk/TBST and added to the membranes for 1hr incubations at room temperature. The membranes were washed 3 times with TBST, 5min per wash, and then incubated with ECL for 5min before imaging using X-ray film.

#### **Supplementary Methods References:**

1. Ferrer-Torres D, Nancarrow DJ, Kuick R, et al. Genomic similarity between gastroesophageal junction and esophageal Barrett's adenocarcinomas. *Oncotarget* 2016;7:54867-54882.
2. Ye J, Coulouris G, Zaretskaya I, et al. Primer-BLAST: a tool to design target-specific primers for polymerase chain reaction. *BMC Bioinformatics* 2012;13:134.
3. Lin L, Bass AJ, Lockwood WW, et al. Activation of GATA binding protein 6 (GATA6) sustains oncogenic lineage-survival in esophageal adenocarcinoma. *Proc Natl Acad Sci U S A* 2012;109:4251-6.
4. Livak KJ, Schmittgen TD. Analysis of relative gene expression data using real-time quantitative PCR and the 2(-Delta Delta C(T)) Method. *Methods* 2001;25:402-8.
5. Blin N, Stafford DW. General Method for Isolation of High Molecular-Weight DNA from Eukaryotes. *Nucleic Acids Research* 1976;3:2303-2308.
6. Zhao Y, Marotta M, Eichler EE, et al. Linkage disequilibrium between two high-frequency deletion polymorphisms: implications for association studies involving the glutathione-S transferase (GST) genes. *PLoS Genet* 2009;5:e1000472.
7. Marotta M, Piontkivska H, Tanaka H. Molecular trajectories leading to the alternative fates of duplicate genes. *PLoS One* 2012;7:e38958.

**Supplementary Table S1.** Summary of Sample Group Characteristics<sup>1</sup>

|          | <b>N</b> | <b>Age<br/>&gt;55 years</b> | <b>Gender<br/>Male</b> | <b>Smoked<br/>history<sup>2</sup></b> | <b>GERD<br/>status<sup>3</sup></b> | <b>BMI &gt;25<br/>overweight<sup>4</sup></b> | <b>BE/EAC<br/>pathology</b> |
|----------|----------|-----------------------------|------------------------|---------------------------------------|------------------------------------|----------------------------------------------|-----------------------------|
| AA-NE    | 12       | 8 (67%)                     | 12 (100%)              | 11 (92%)                              | 2 (17%)                            | 11 (92%)                                     | 0 (0%)                      |
| EA-NE    | 12       | 5 (42%)                     | 12 (100%)              | 10 (83%)                              | 4 (33%)                            | 11 (92%)                                     | 0 (0%)                      |
| AA-NE:BE | 8        | 7 (88%)                     | 5 (63%)                | 7 (88%)                               | 8 (100%)                           | 7 (88%)                                      | 8 (100%) <sup>5</sup>       |
| EA-NE:BE | 8        | 7 (88%)                     | 6 (75%)                | 6 (75%)                               | 7 (88%)                            | 6 (75%)                                      | 8 (100%) <sup>6</sup>       |

1 - clinical/demographic data was collected in conjunction with study enrollment consent

2 - individuals classified as positive recorded as current or former smoker

3 - individual classified as positive when reporting regurgitation or heart burn at least once per week, or with a medical diagnosis of GERD

4 - individuals reporting current weight as >25 classified as overweight

5 - one individual resected for EAC with prior BE history, one resected for HGD, one with LGD, five with non-dysplastic BE

6 - four individuals resected for EAC with prior BE history, four resected for EAC at initial presentation

**Supplementary Table S2.** Genes with FC > 3 and ANOVA *P* < 0.01 for AA-NE vs EA-NE comparison

| Symbol   | Gene Name                                             | Entrez Gene | ANOVA <i>P</i> -value* |              |                |                | Fold change^  |                     |                  |                  |
|----------|-------------------------------------------------------|-------------|------------------------|--------------|----------------|----------------|---------------|---------------------|------------------|------------------|
|          |                                                       |             | AA-NE vs EA-NE         | NE:BE vs EA- | NE:BE vs AA-NE | NE:BE vs EA-NE | AA-NE / EA-NE | AA-NE:BE / EA-NE:BE | AA-NE:BE / AA-NE | EA-NE:BE / EA-NE |
| GSTT2    | glutathione S-transferase theta 2                     | 2953        | 0.00035                | 0.1372       | 0.0479         | 0.8557         | 5.15          | 2.17                | 0.39             | 0.92             |
| GSTT2B   | glutathione S-transferase theta 2B (gene/pseudogene)  | 653689      | 0.00157                | 0.0700       | 0.1038         | 0.5163         | 3.13          | 2.15                | 0.54             | 0.78             |
| HLA-DPB1 | major histocompatibility complex, class II, DP beta 1 | 3115        | 0.00724                | 0.9458       | 0.6697         | 0.0486         | 3.13          | 1.03                | 0.82             | 2.50             |
| IGHD     | immunoglobulin heavy constant delta                   | 3495        | 0.00763                | 0.0307       | 0.0644         | 0.0039         | 5.07          | 0.21                | 0.29             | 7.24             |
| IGHA1    | immunoglobulin heavy constant                         | 3493        | 0.00742                | 5.45E-06     | 0.0169         | 1.03E-06       | 3.77          | 0.05                | 0.27             | 21.53            |

\**P* value from one-way ANOVA comparison of AA-NE and EA-NE normalized log<sub>2</sub> Affy ST 2.1 expression data

^Mean group fold changes (FC) were calculated and presented as non-log ratios

**Supplementary Table S3.** Promoter duplication allele and genotype frequency details across 1000G population groups

| Population description                     | Pop. code | Super pop. | sample size* (subjects) | Allele              |                 |                             | Genotype                        |                     |                             |                                |
|--------------------------------------------|-----------|------------|-------------------------|---------------------|-----------------|-----------------------------|---------------------------------|---------------------|-----------------------------|--------------------------------|
|                                            |           |            |                         | non-duplicated [=w] | duplicated [=D] | duplicated allele frequency | homozygous non-duplicates [=ww] | heterozygotes [=wD] | homozygous duplicates [=DD] | homozygous duplicate frequency |
| African Carribeans in Barbados             | ACB       | AFR        | 61                      | 34                  | 88              | 72.1%                       | 15                              | 4                   | 42                          | 68.9%                          |
| Americans of African Ancestry in SW USA    | ASW       | AFR        | 30                      | 16                  | 44              | 73.3%                       | 7                               | 2                   | 21                          | 70.0%                          |
| Esan in Nigeria                            | ESN       | AFR        | 63                      | 25                  | 101             | 80.2%                       | 7                               | 11                  | 45                          | 71.4%                          |
| Gambian in Western Divisions in The Gambia | GWD       | AFR        | 76                      | 53                  | 99              | 65.1%                       | 17                              | 19                  | 40                          | 52.6%                          |
| Luhya in Webuye                            | LWK       | AFR        | 48                      | 14                  | 82              | 85.4%                       | 4                               | 6                   | 38                          | 79.2%                          |
| Mende in Sierra Leone                      | MSL       | AFR        | 60                      | 51                  | 69              | 57.5%                       | 21                              | 9                   | 30                          | 50.0%                          |
| Yoruba in Ibadan                           | YRI       | AFR        | 57                      | 39                  | 75              | 65.8%                       | 14                              | 11                  | 32                          | 56.1%                          |
| Colombians from Medellin, Colombia         | CLM       | AMR        | 53                      | 16                  | 90              | 84.9%                       | 4                               | 8                   | 41                          | 77.4%                          |
| Mexican Ancestry from Los Angeles USA      | MXL       | AMR        | 24                      | 0                   | 48              | 100.0%                      | 0                               | 0                   | 24                          | 100.0%                         |
| Peruvians from Lima, Peru                  | PEL       | AMR        | 53                      | 4                   | 102             | 96.2%                       | 0                               | 4                   | 49                          | 92.5%                          |
| Puerto Ricans from Puerto Rico             | PUR       | AMR        | 48                      | 7                   | 89              | 92.7%                       | 1                               | 5                   | 42                          | 87.5%                          |
| Chinese Dai in Xishuangbanna, China        | CDX       | EAS        | 68                      | 8                   | 128             | 94.1%                       | 1                               | 6                   | 61                          | 89.7%                          |
| Han Chinese in Beijing                     | CHB       | EAS        | 58                      | 5                   | 111             | 95.7%                       | 1                               | 3                   | 54                          | 93.1%                          |
| Han Chinese South                          | CHS       | EAS        | 44                      | 2                   | 86              | 97.7%                       | 0                               | 2                   | 42                          | 95.5%                          |
| Japanese in Tokyo                          | JPT       | EAS        | 57                      | 6                   | 108             | 94.7%                       | 2                               | 2                   | 53                          | 93.0%                          |
| Kinh in Ho Chi Minh City, Vietnam          | KHV       | EAS        | 65                      | 6                   | 124             | 95.4%                       | 2                               | 2                   | 61                          | 93.8%                          |
| Utah residents with ancestry from Europe   | CEU       | EUR        | 58                      | 3                   | 113             | 97.4%                       | 1                               | 1                   | 56                          | 96.6%                          |
| Finnish in Finland                         | FIN       | EUR        | 34                      | 3                   | 65              | 95.6%                       | 0                               | 3                   | 31                          | 91.2%                          |
| British from England and Scotland          | GBR       | EUR        | 47                      | 3                   | 91              | 96.8%                       | 1                               | 1                   | 45                          | 95.7%                          |
| Iberian populations in Spain               | IBS       | EUR        | 62                      | 14                  | 110             | 88.7%                       | 3                               | 8                   | 51                          | 82.3%                          |
| Toscans in Italia                          | TSI       | EUR        | 67                      | 16                  | 118             | 88.1%                       | 7                               | 2                   | 58                          | 86.6%                          |
| Bengali from Bangladesh                    | BEB       | SAS        | 60                      | 0                   | 120             | 100.0%                      | 0                               | 0                   | 60                          | 100.0%                         |
| Gujarati Indian from Houston, Texas        | GIH       | SAS        | 64                      | 11                  | 117             | 91.4%                       | 5                               | 1                   | 58                          | 90.6%                          |
| Indian Telugu from the UK                  | ITU       | SAS        | 64                      | 6                   | 122             | 95.3%                       | 2                               | 2                   | 60                          | 93.8%                          |
| Punjabi from Lahore, Pakistan              | PJL       | SAS        | 63                      | 2                   | 124             | 98.4%                       | 1                               | 0                   | 62                          | 98.4%                          |
| Sri Lankan Tamil from the UK               | STU       | SAS        | 59                      | 5                   | 113             | 95.8%                       | 0                               | 5                   | 54                          | 91.5%                          |

\* not all samples yielded data for *GSTT2* promotor genotype status



**A*****GSTT2/2B* qRT-PCR**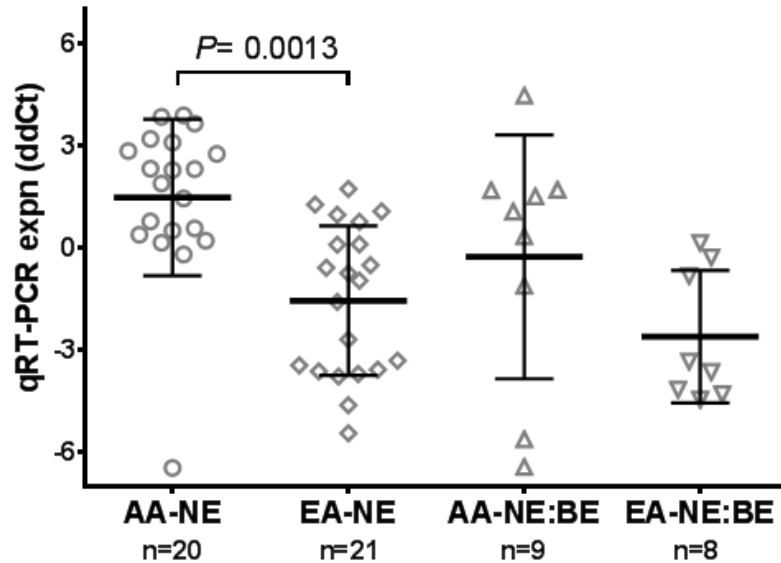**B*****GSTT2/2B* qRT-PCR vs. array**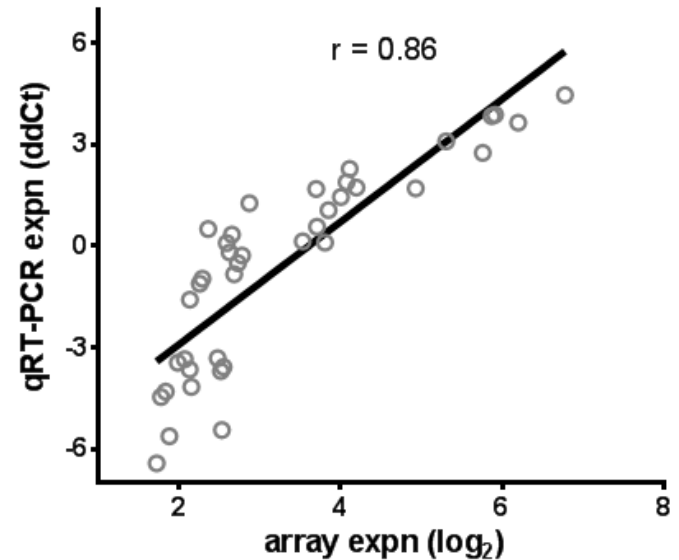

**Supplementary Figure S1. PCR based validation of *GSTT2* expression and correlation to array data. (A)** Validation of *GSTT2/2B* expression in the NE of AA and EA with and without Barrett's (BE) using qRT-PCR with a larger cohort confirms differential mRNA expression of *GSTT2/2B* in AA vs. EA ( $P=0.0013$ ). One-way ANOVA was used with Tukey post-hoc adjustment for comparisons performed across the 4 sample groups. The significant  $P$  value for the AA-NE vs. EA-NE comparison is shown, while the other comparisons, AA-NE:BE vs. EA-NE:BE, AA-NE vs. AA-NE:BE and EA-NE vs. EA-NE:BE were not significant with  $P$  values of 0.21, 0.30 and 0.73 respectively. **(B)** Pearson-correlation analysis for *GSTT2/2B* comparing  $\log_2$  normalized Human Gene 2.1 ST arrayed samples and relative qRT-PCR expression, with ddCt with *ACTB* as the reference gene ( $r=0.86$ ,  $n=39$ ).

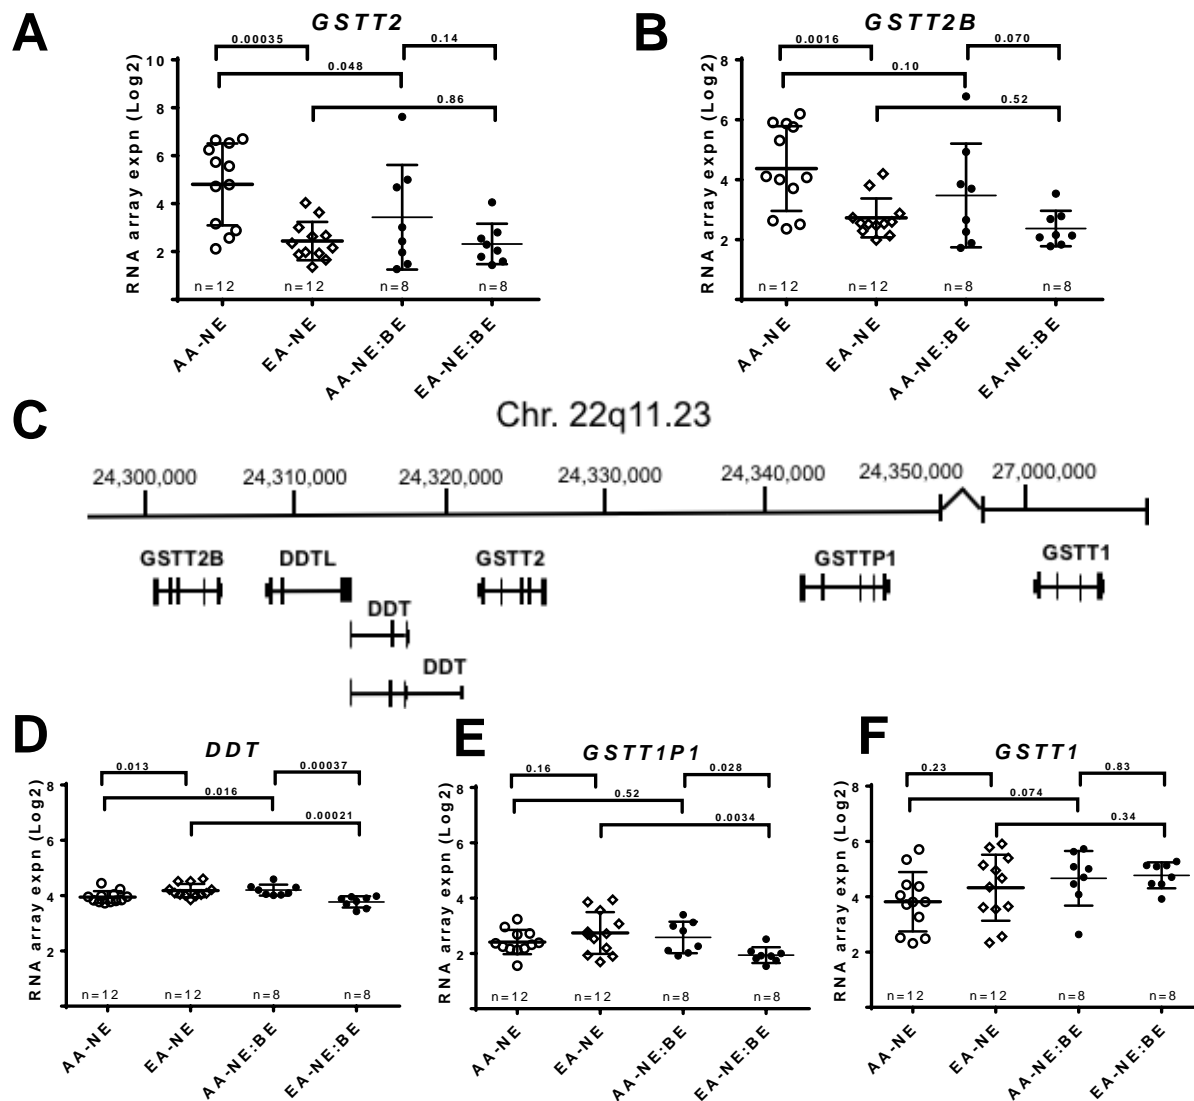

**Supplementary Figure S2. Map of chromosome 22q11.1 region containing *GSTT2* and array analyses of neighboring genes. (A) *GSTT2* and (B) *GSTT2B* (A) array results of all four squamous (NE) tissue groups from AA and EA, showing differential expression between population control groups but not between disease groups. (C) Genomic map of the human *GSTT2B/GSTT2* region at chromosome 22q11.23 in hg19, including *GSTT* family members *GSTTP1* and *GSTT1*. (B-D) array analyses of the four squamous (NE) tissue groups from AA and EA indicate that neither *DDT* nor *GSTT* family members *GSTTP1* and *GSTT1* are not differentially expressed between control groups. One-way ANOVA with terms for the means of four groups to log-transformed gene expression data, as described in Materials and Methods.**

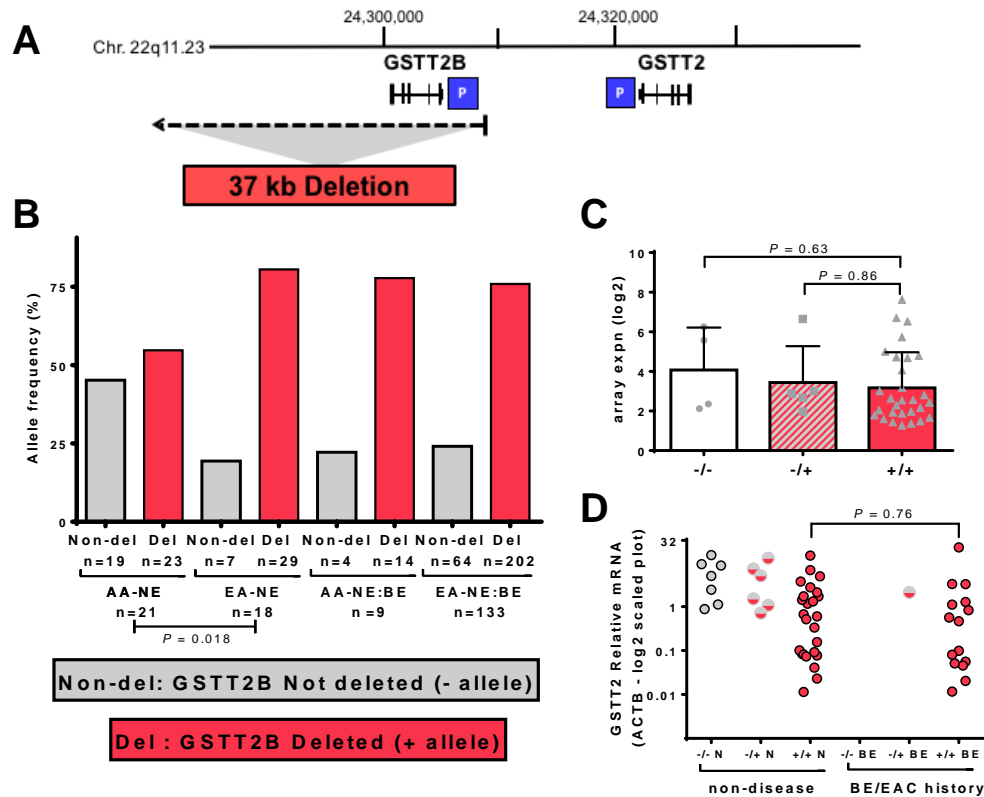

**Supplementary Figure S3. Investigating *GSTT2B* deletion allele in esophageal squamous tissue samples from AA and EA, with and without a history of BE.** (A) *GSTT2/2B* locus structure showing the 37kb deletion that removes the *GSTT2B* locus. “p” denotes gene promoter, highlighting the inverse orientation of the *GSTT2* genes. (B) Allele frequency of the 37kb *GSTT2B* deletion in NE of EA and AA with disease (BE) and without disease (NE). A trend towards an increased incidence of the deletion in EA was noted (two-sided Fisher Exact Test). Comparisons involving AA-NE:BE versus AA:NE or either EA group were not significant. The comparison between disease and non-disease EA groups was also not significant. (C) All arrayed NE samples combined show no evidence that *GSTT2B* deletion homozygosity (most common genotype; n=29) resulted in decreased expression relative to homozygous for the non-deleted genotype (n=4), or heterozygote (n=5) genotypes. Log<sub>2</sub>-adjusted *GSTT2* array expression results were not different when the 3 genotypes were compared with one-way ANOVA ( $P=0.65$ ), nor pair-wise with Tukey post-hoc test for genotype combinations (0.24 0.55, 0.98 for ‘-/-’ vs ‘-/+ & +/+’, ‘-/-’ vs ‘+/+’ and ‘-/+’ vs ‘-/- & +/+’, respectively). Note that two samples failed to amplify for the *GSTT2B* allele test after three attempts. (D) The presence or absence of BE did not influence the effect of the *GSTT2B* deletion on *GSTT2/2B* mRNA expression ( $P=0.76$  by one-way ANOVA), such that EA with either ‘+/+’ or ‘-/+’ genotypes had consistently lower expression relative to AA with the same genotype. ddCt qRT-PCR results are shown, where *ACTB* was used as the reference gene. Samples include 37 of the original 40 arrayed samples (1 mRNA and 2 DNAs failed to amplify, as noted) and an additional 17 samples, where an additional 2 samples failed to amplify for the *GSTT2* deletion genotype.

## Reverse strand alignment of 17 base promoter duplication

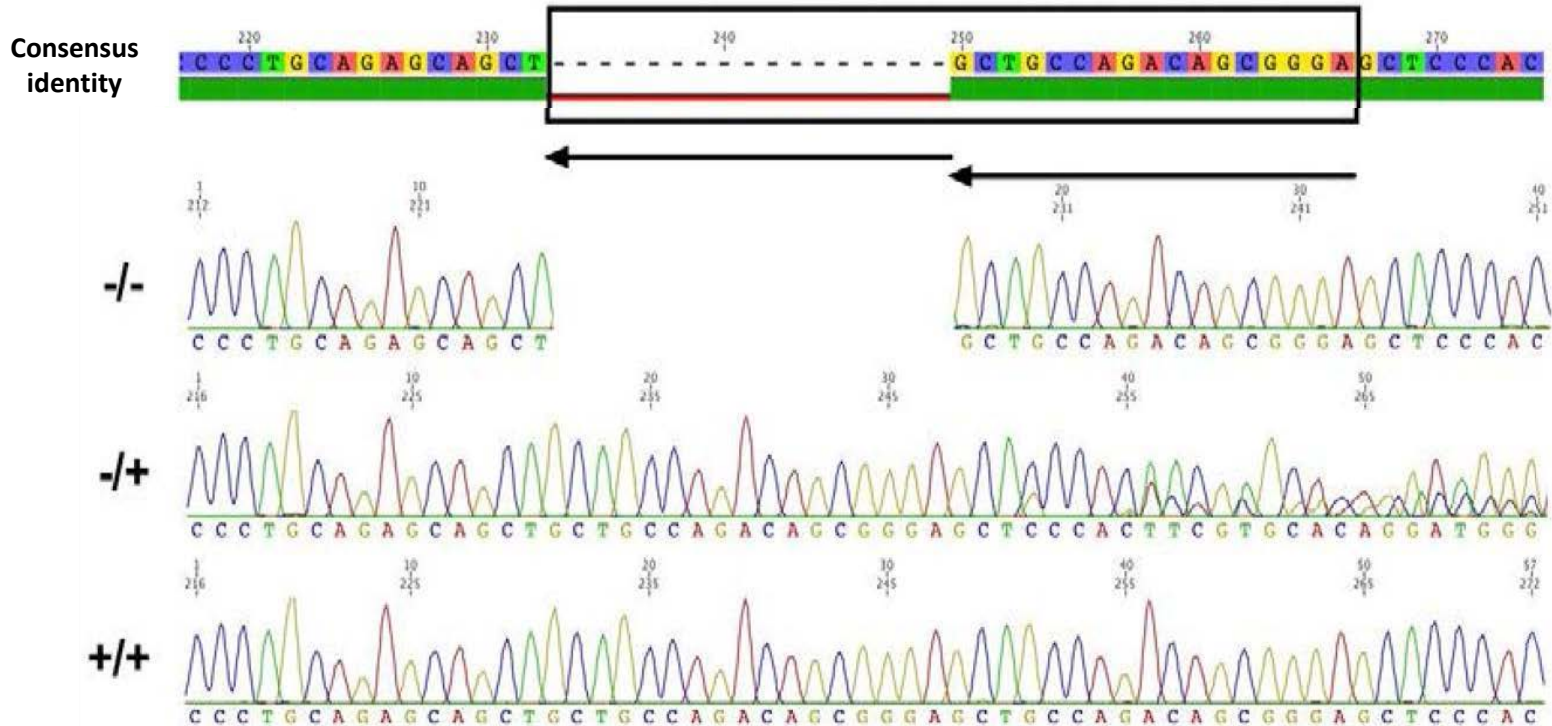

**Supplementary Figure S4. Example 17bp *GSTT2* variant genotype sequences.** Examples of the *GSTT2/2B* 17bp duplication genotypes using reverse strand sequences showing the alignment generated using Geneious and manual alignment of raw sequence traces.

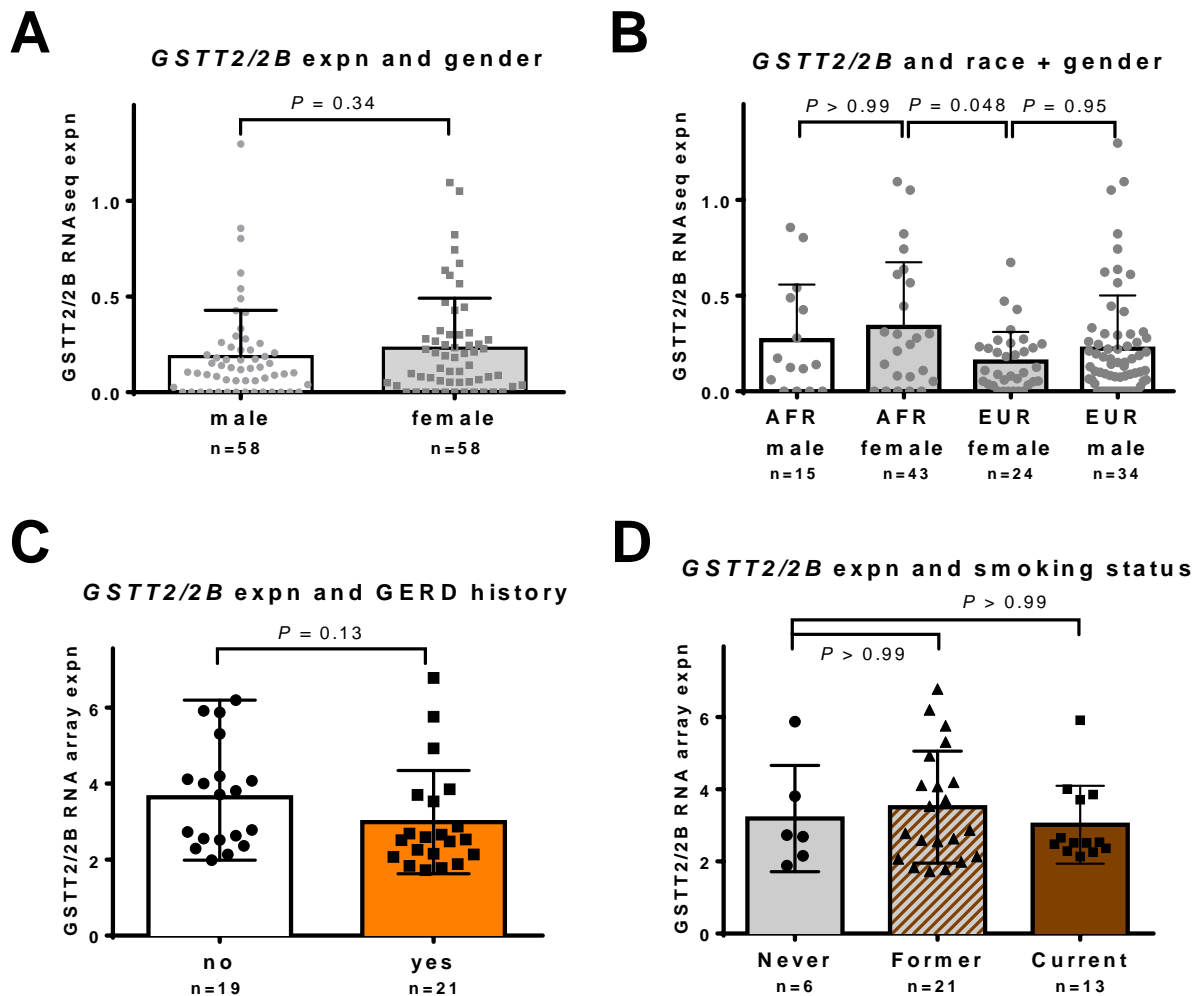

**Supplementary Figure S5. Additional *GSTT2* mRNA analyses of potential confounding effects.** Using 1000 Genomes population controls (n=116) we observe that differences in *GSTT2/2B* mRNA expression is not significantly different between **(A)** genders but were **(B)** race dependent, with a difference in expression levels seen between AFR and EUR females, but not males ( $P > 0.99$ ), nor between genders for either race as shown. RPKM values were obtained from previous 1000G/Hapmap publications, as described in the methods. Within the 40 arrayed NE samples differences in *GSTT2* expression were not explained in terms of either the presence of **(C)** GERD nor **(D)** smoking status where no association was seen with the overall ANOVA, nor pair-wise group tests, between *GSTT2* levels and cigarette usage. Log<sub>2</sub>-adjusted expression values for *GSTT2* were plotted in Prism, with one-way ANOVA was used in each panel. The Bonferroni post-hoc test was applied across the 4 and 3 pair-wise tests for race/gender and self-reported smoking status in panels B and D, respectively.

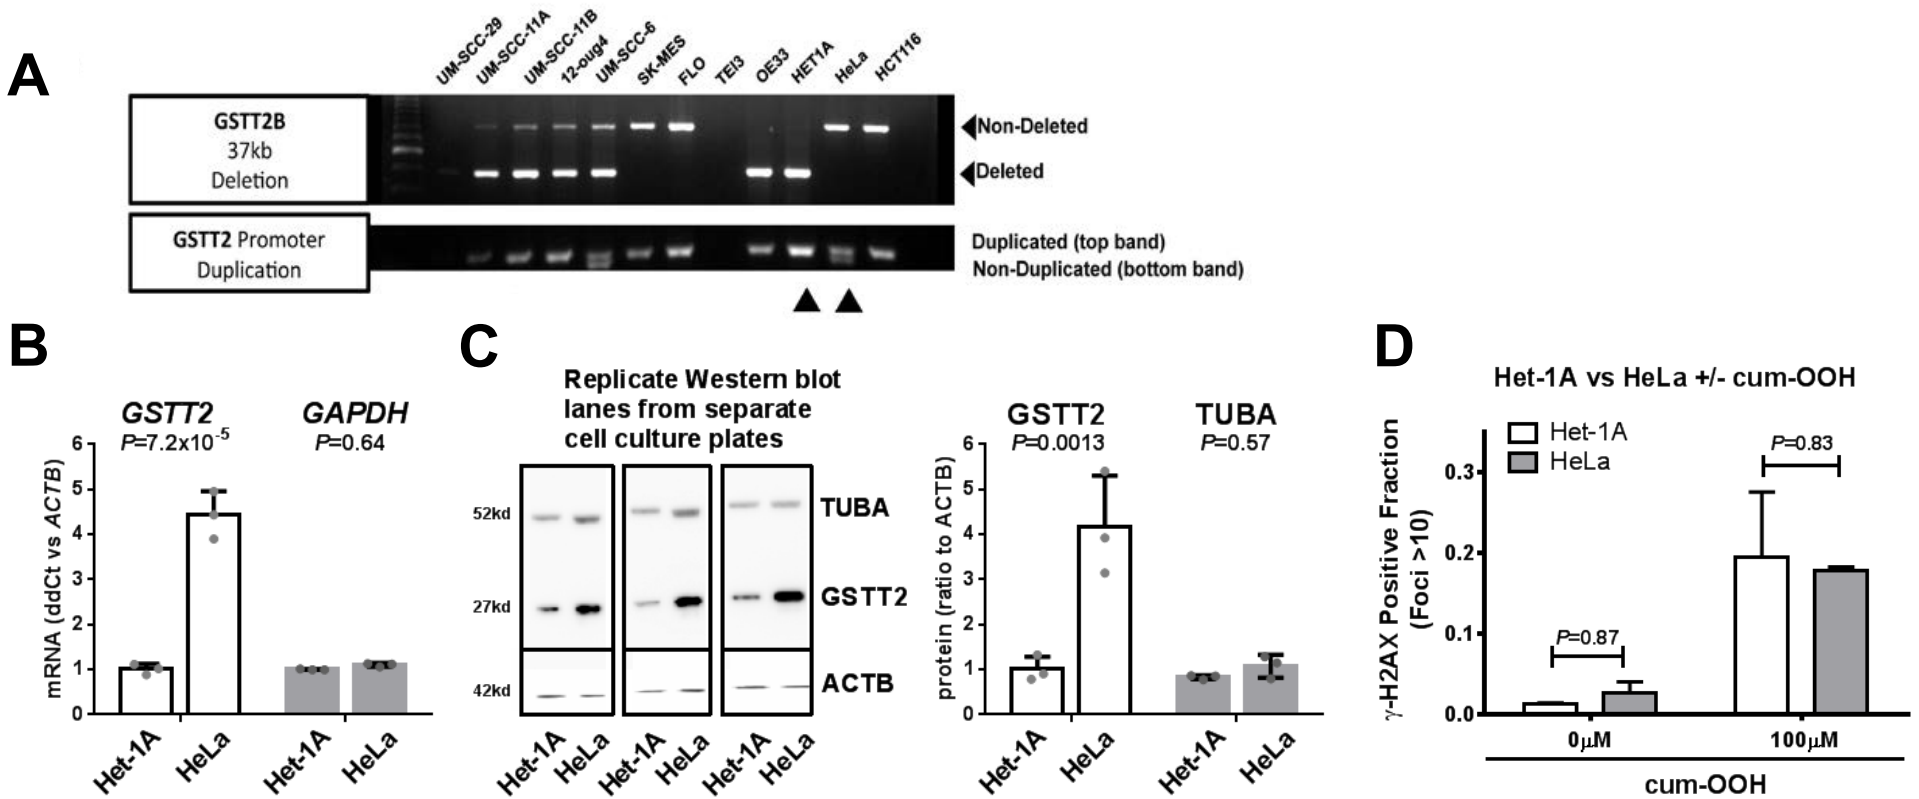

**Supplementary Figure S6. Het-1A and HeLa susceptibility to DNA damage with and without Cu-OOH treatment.** (A) *GSTT2/2B* 37kb deletion and promoter duplication genotyping in a cohort of 12 cell lines. Bottom triangles highlight the Het-1A and HeLa AA cell lines. (B) qRT-PCR and (C) western blots were performed on HeLa and Het-1A to measure endogenous *GSTT2/2B* levels, with mean and standard deviation of replicate plate expression comparisons, relative to ACTB mRNA or protein, with *GAPDH* and TUBA shown as similarly normalized housekeeping gene and protein respectively. Two-way ANOVA was used for both mRNA and protein comparisons between cell lines, with unadjusted two group comparison *P* values shown. (D) Quantification of  $\gamma$ -H2AX positive foci in Het-1A and HeLa cells, with and without cum-OOH treatment, with the average ratios (per plate matched  $\gamma$ -H2AX and DAPI cell counts) and standard deviations shown for two experiments, each consisting of duplicate measures. Nuclei with >10 positively-stained foci were considered as representing a cell positive for DNA damage. Presented measures are non-siRNA controls for the *GSTT2* knockdown studies presented in Sup Figure 7 to show the importance of *GSTT2* in the cellular response to genotoxic stress. Therefore, *P* values comparing the level of DNA damage response between these cell lines, with and without cum-OOH, were derived from the 4-way ANOVA with terms of cum-OOH (0 vs 100uM), cell type (Het-1A vs HeLa), treatment (control, siRNA05, siRNA06) and experiment day, as detailed in Supplementary Methods. While both cell lines showed some DNA damage response following cum-OOH treatment, with  $P=0.034$  and 15 fold for Het-1A and  $P=0.067$  and 7 fold for HeLa, we saw no significant difference in the level of DNA damage response between these cell lines, either endogenous or cum-OOH induced, even though they have key differences in *GSTT2* genotypes. A two-tailed, paired t-test gave a similarly non-significant result ( $P=0.91$ ) as the ANOVA model and fold changes were also nominal with 0.52 and 1.1 for the Het-1A/HeLa ratio of untreated and 100uM cum-OOH respectively.

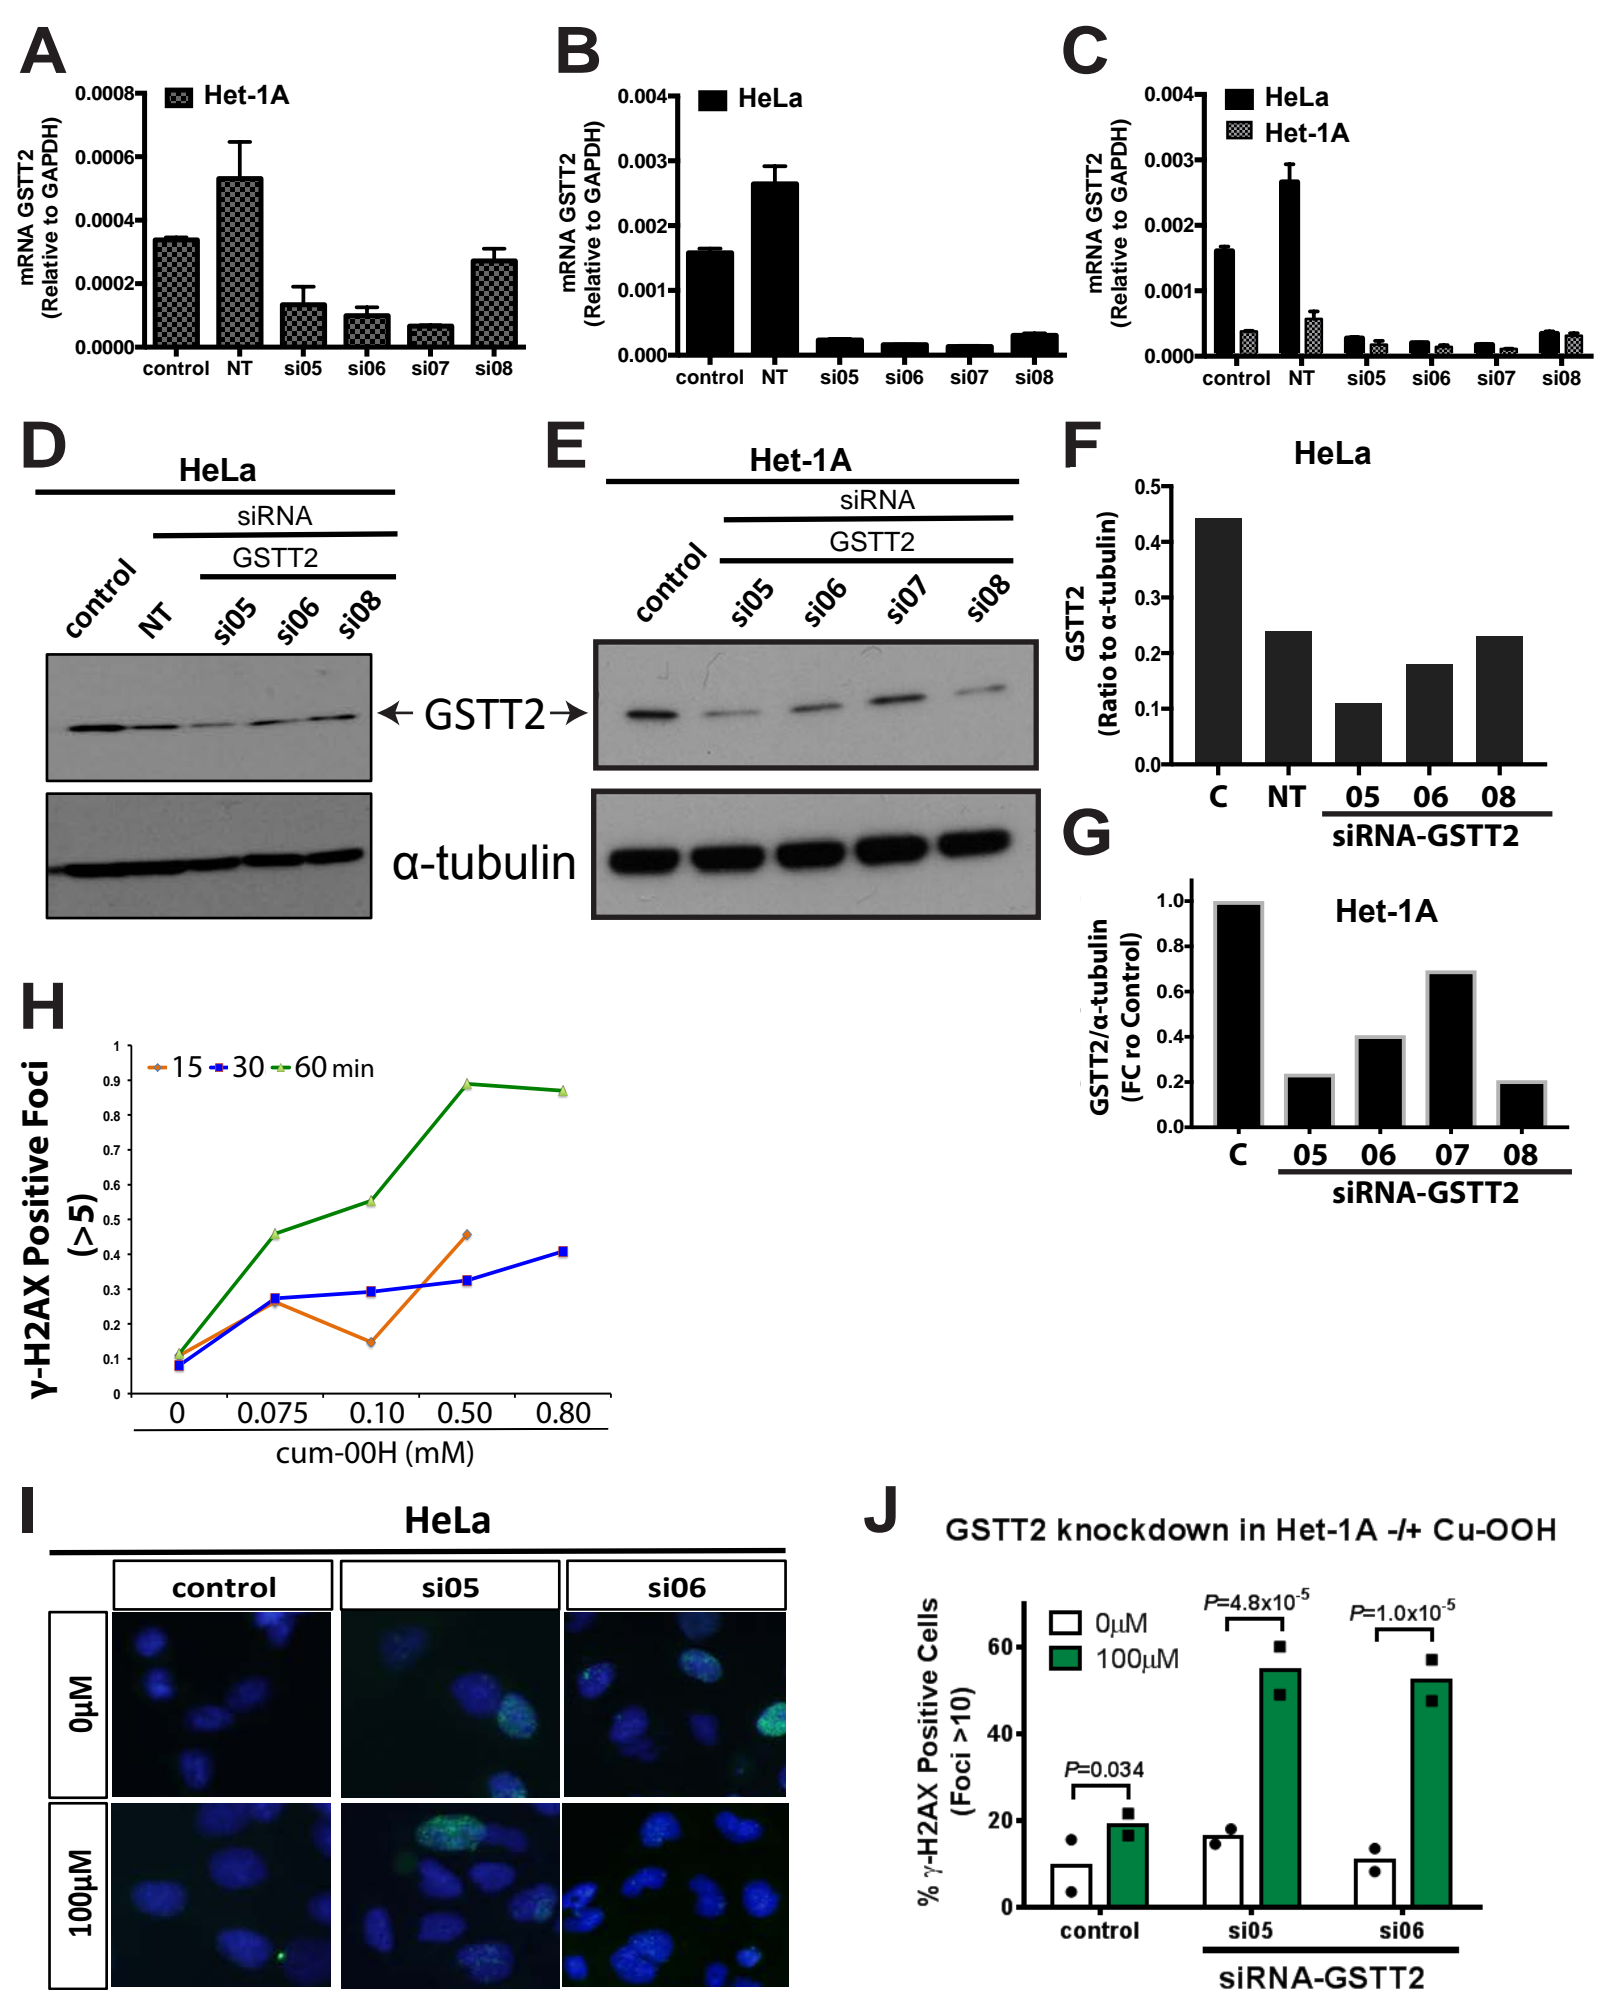

**Supplementary Figure S7. Validation of *GSTT2* knockdown in Het-1A and HeLa cells. (A-G)** Relative *GSTT2/2B* mRNA expression in Het-1A (A, E, G) and HeLa (B, D, F) cells after 48hr transfection with four siRNAs. Panel C shows the comparative knockdown between the two cell lines. (H-J) Quantification of positive foci for  $\gamma$ -H2AX in HeLa, with the averaged ratio for 2 experiments shown (2 replicates for each experiment, each with a matched  $\gamma$ -H2AX count). Nuclei with >10 positively-stained foci were considered as representing a cell positive for DNA damage. Values were normalized to the mean of the untreated control group, and two-way ANOVA, with Tukey post-hoc adjustment, was used to assess pair-wise comparisons between siRNA treatments and controls, and the cum-OOH treatment response. While data trend similar to Het-1A (Figure 4), *P* values for control and two siRNAs with and without cum-OOH were not significant (shown). Contrasts between 0 $\mu$ M cum-OOH treatments were also non-significant (*P*=0.32, 0.12 and 0.94 for comparisons of control to siRNA05, control to siRNA6 and siRNA05 to siRNA06 respectively) and only control to siRNA6 was significant (*P*=0.0092) at 100 $\mu$ M cum-OOH, but not control to siRNA05 or siRNA05 to siRNA06 (*P*=0.60 and 0.45, respectively).



**A**

24 hr C-PAC treatment

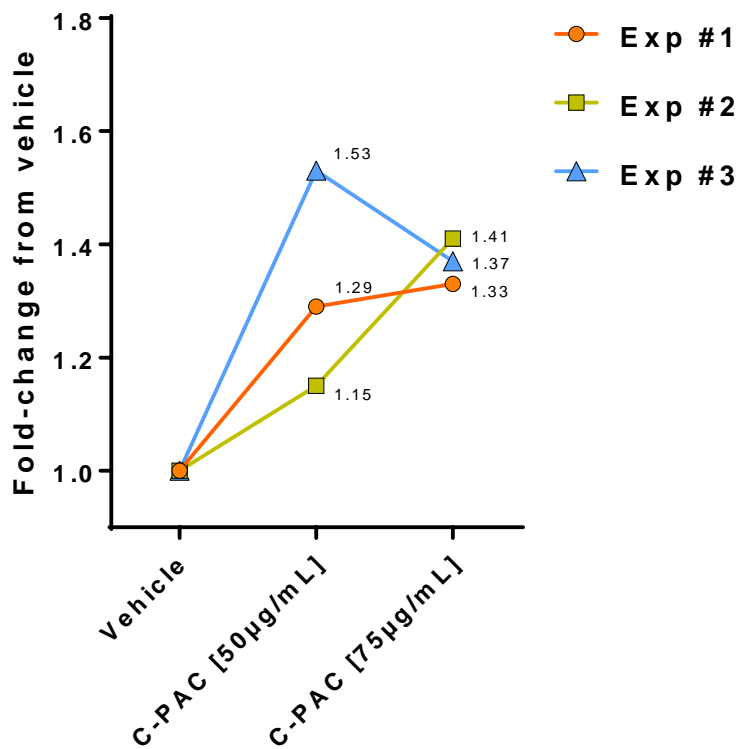**B**

48 hr C-PAC treatment

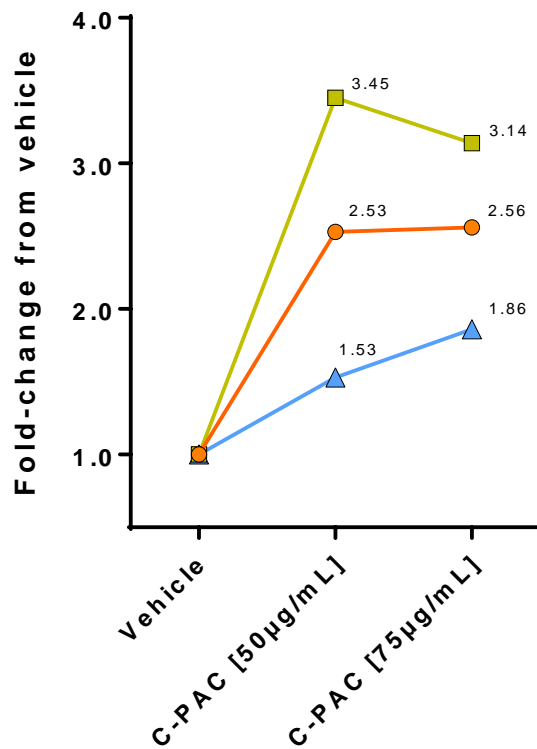**C**

GSTT2 levels in EGDA rat model

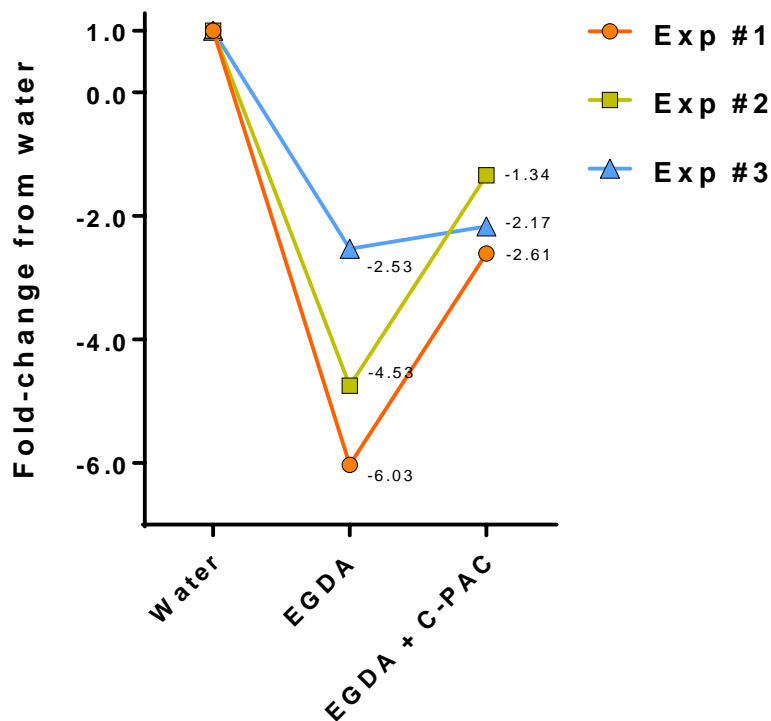**D**P-H2AX<sup>Ser139</sup> levels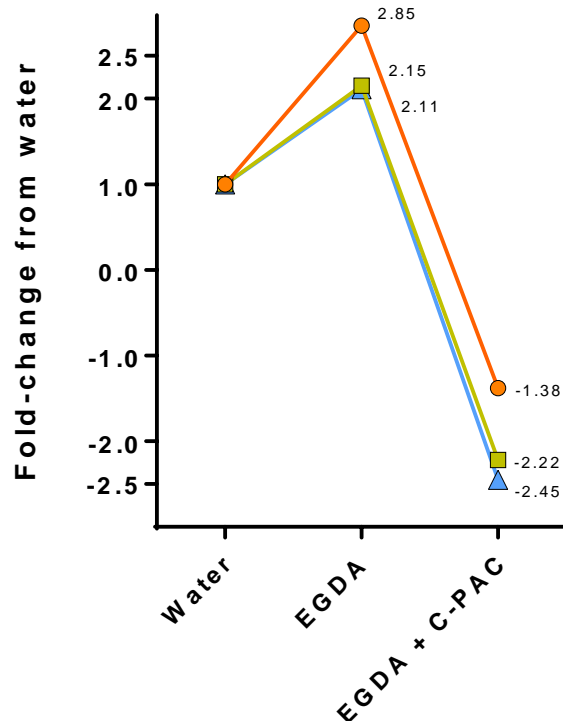

**Supplementary Figure S8. Westerns blot results of relative fold-change across triplicate experiments for C-PAC treatment of Het-1A and EGDA rats.** Relative protein ratios (GSTT2 vs HSP60) following (A) 24 and (B) 48hr C-PAC treatment of Het-1A cells. Each ratio (GSTT2/HSP90) was normalized to within-experiment vehicle (set to 1), with relative ratio values shown for each experimental point. Western blots and statistics are presented in **Figure 4A-B.** (C-D) Western blot results showing C-PAC mitigation of GSTT2 loss coincides with protection against the DNA damaging effects of gastroduodenal reflux in an esophagogastrroduodenal anastomosis (EGDA) rat model, with relative esophageal protein levels of (C) GSTT2 and (D) Phospho-H2AXSer139 protein levels ( $\gamma$ -H2AX) contrasted with and without C-PAC treatment. Ratios (HSP60 as reference) for GSTT2 and  $\gamma$ -H2AX were normalized to the assigned reference (water only) animal (ratio set to 1), with relative ratio values shown for each experimental point. Western blots and statistics are presented in **Figure 4C-B.**

## Supplemental Array Analyses

In order to investigate comparative expression profiles between our 4 arrayed NE sample groups we employed principal component analysis (PCA) to investigate variance distribution, as well as one-way ANOVA with unprotected Fisher's Least Significant Difference (LSD) (Fisher 1935; Hochberg and Tamhane 1987), as implemented in Prism 7 by Graphpad Software) for the 4 groups, combined with mean-group fold-change comparisons. Plots of the first 5 principal components (**Insert 1**) showed a clear separation of EA-NE:BE from the other 3 groups by PCA component 1, with poor separation between the other 3 groups (**Insert 1**). For the ANOVA analysis we only conducted the four key inter-group comparisons: between population control groups (EA-NE vs AA-NE), between disease groups (EA-NE:BE vs AA-NE:BE) and the normal-disease comparisons within each population (EA-NE:BE vs EA-NE and AA-NE:BE vs AA-NE). Using a threshold of  $P < 0.01$  we identified 375, 8,983, 10,304 and 769 differentially expressed genes for the EA-NE vs AA-NE, EA-NE:BE vs AA-NE:BE, EA-NE:BE vs EA-NE and AA-NE:BE vs AA-NE comparisons, respectively. We estimated false discovery rates of 0.61, 0.027, 0.023 and 0.31 for these comparisons, respectively, by analyzing 10,000 data sets in which the sample labels were randomly permuted, and averaged the number of qualifying probe-sets across the 10,000 data sets. These results suggest that the two comparisons involving the EA-NE:BE group resulted in significantly more genes that were expected by change.

A VENN diagram (Heberle et al. 2015) of differential genes obtained by between-group one-way ANOVA comparisons ( $P < 0.01$ ) shows that a majority of these genes (96.9%) involved EA-NE:BE comparisons to other groups (**Insert 2**). Thus both at the individual sample, and sample-groups levels, through supervised and unsupervised comparisons, the EA-NE:BE cohort had very distinct expression profiles.

While initially a surprise, there is a key difference between EA-NE:BE and AA-NE:BE groups that explains our results. All 8 EA-NE:BE individuals had progressed to cancer, as compared to 1 out of 8 AA-NE:BE individuals. Moreover, significant mRNA expression differences in esophageal squamous tissue from cancer patients has previously been noted, as compared to both BE patients who have not progressed, and individuals with no esophageal disease history (Brabender et al. 2005; Saadi et al. 2010). These manuscripts compared biopsied squamous material collected at least 4 cm from primary esophageal lesions or control subjects, and showed overlapping, but discreet, sets of expression changes in the squamous from subjects with cancer. We ranked the two sets of genes identified by these studies (Brabender et al. 2005; Saadi et al. 2010) according to how well they discriminated EA-NE:BE from our other sample groups (by fold-change and  $P$  values, as presented in **Insert Table 1**) as shown by heatmap in **Insert 3**. The Cox-2 gene (*PTGS2*) was over-expressed among the squamous samples from cancer patients, relative to non-EAC subjects, in all 3 studies (**Insert 3**, Brabender et al. 2005; Saadi et al. 2010). Cox-2 is a key enzyme in the production of prostaglandins, that are chiefly responsible for localized immune responses (reviewed by Ricciotti and Fitzgerald 2011). Increased Cox-2 levels have been a feature of EAC (reviewed in Liao et al. 2012), and other cancer studies (reviewed by Liu, Qu, and Yan 2015) and it is believed that a chronic reduction in PGE2 levels via Cox-2 modulation is the chief benefit of NSAID treatment linked to reduced cancer risk. Excluding *PTGS2*, we plotted averaged Z-scores for the five next best genes from each of the two previous studies against each other to highlight that these focused gene sets can also discriminate our squamous from cancer subset (EA-NE:BE) from other squamous groups. Six of the ten genes identified by Saadi and coworkers were strongly increased in the stroma of our cancer patient vs control groups ( $FC > 2$  with  $P < 0.01$  in both EA-NE:BE vs AA-NE:BE and EA-NE:BE vs EA-NE comparisons; **Insert Table 1**). Similarly, 7/12 genes originally reported by Brabender et al., as significantly different between the squamous mucosa of cancer and non-cancer subjects, discriminated EA-NE:BE in our data ( $P < 0.01$ ), although only five of these showed the same fold-change direction in our cohort (**Insert Table 1**). As noted by Saadi and co-workers in their analysis of several older datasets, some of these differential NE-expressing genes (*PTGS2*, *SPARC*, *TSPAN1*, *TSPAN8* and *MMP7* rather than *MMP1*) have shown increased expression in tissues spanning the EAC-related progression from normal squamous (from

individuals with no esophageal disease history) through BE to EAC tumor tissue (Botelho et al. 2010; Saadi et al. 2010), through many genes show differential expression between these tissues. Thus, in our data many genes distinguished the EA-NE:BE sample group from the other NE sample groups (**Insert 2**), including a subset of genes that overlap with previous studies (**Insert 3**) to highlight existence of an esophageal tissue field effect associated with disease progression. Several studies have observed this progression-related field effect with metabolic profiling (Yakoub et al. 2010; Reed et al. 2017). In addition, gene ontology analysis (DAVID; Huang et al. 2007) of genes over-expressed in the EA-NE:BE sample group (ANOVA  $P < 0.01$  and  $FC > 2$ ), as clustered by REVIGO (Supek et al. 2011), show over-representation of extracellular matrix reorganization, cell adhesion and angiogenesis (**Insert 4**), further suggesting the presence of a cancer field effect, or perhaps more accurately etiological field effect (Lochhead et al. 2015) where a combination of risk factor exposure and risk factor susceptibility resulted in chronic esophageal tissue damage culminating in the formation of EAC. We believe this diffuse expression signal is evidence for the chronic changes to the lower esophagus including the surrounding squamous tissue, as previously suggested (Saadi et al. 2010; Lochhead et al. 2015). It is for this reason that we weighted our initial energies towards the investigation of differences between our normal squamous sample groups, with only supporting evidence from our disease groups. By far the best of these candidates was *GSTT2*.

## References:

- Botelho, N. K., F. I. Schneiders, S. J. Lord, A. K. Freeman, S. Tyagi, D. J. Nancarrow, N. K. Hayward, D. C. Whiteman, and R. V. Lord. 2010. 'Gene expression alterations in formalin-fixed, paraffin-embedded Barrett esophagus and esophageal adenocarcinoma tissues', *Cancer Biol Ther*, 10: 172-9.
- Brabender, J., P. Marjoram, R. V. Lord, R. Metzger, D. Salonga, D. Vallbohmer, H. Schafer, K. D. Danenberg, P. V. Danenberg, F. M. Selaru, S. E. Baldus, A. H. Holscher, S. J. Meltzer, and P. M. Schneider. 2005. 'The molecular signature of normal squamous esophageal epithelium identifies the presence of a field effect and can discriminate between patients with Barrett's esophagus and patients with Barrett's-associated adenocarcinoma', *Cancer Epidemiol Biomarkers Prev*, 14: 2113-7.
- Fisher, R.A. 1935. *The Design of Experiments* (Oliver and Boyd: Edinburgh).
- Heberle, H., G. V. Meirelles, F. R. da Silva, G. P. Telles, and R. Minghim. 2015. 'InteractiVenn: a web-based tool for the analysis of sets through Venn diagrams', *BMC Bioinformatics*, 16: 169.
- Hochberg, Y., and A. C. Tamhane. 1987. *Multiple comparison procedures* (John Wiley & Sons, Inc.).
- Huang, D. W., B. T. Sherman, Q. Tan, J. R. Collins, W. G. Alvord, J. Roayaei, R. Stephens, M. W. Baseler, H. C. Lane, and R. A. Lempicki. 2007. 'The DAVID Gene Functional Classification Tool: a novel biological module-centric algorithm to functionally analyze large gene lists', *Genome Biol*, 8: R183.
- Liao, L. M., T. L. Vaughan, D. A. Corley, M. B. Cook, A. G. Casson, F. Kamangar, C. C. Abnet, H. A. Risch, C. Giffen, N. D. Freedman, W. H. Chow, S. Sadeghi, N. Pandeya, D. C. Whiteman, L. J. Murray, L. Bernstein, M. D. Gammon, and A. H. Wu. 2012. 'Nonsteroidal anti-inflammatory drug use reduces risk of adenocarcinomas of the esophagus and esophagogastric junction in a pooled analysis', *Gastroenterology*, 142: 442-52.
- Liu, Bing, Liyan Qu, and Shigui Yan. 2015. 'Cyclooxygenase-2 promotes tumor growth and suppresses tumor immunity', *Cancer Cell International*, 15: 106.
- Lochhead, P., A. T. Chan, R. Nishihara, C. S. Fuchs, A. H. Beck, E. Giovannucci, and S. Ogino. 2015. 'Etiologic field effect: reappraisal of the field effect concept in cancer predisposition and progression', *Mod Pathol*, 28: 14-29.
- Reed, M. A., R. Singhal, C. Ludwig, J. B. Carrigan, D. G. Ward, P. Taniere, D. Alderson, and U. L. Gunther. 2017. 'Metabolomic Evidence for a Field Effect in Histologically Normal and Metaplastic Tissues in Patients with Esophageal Adenocarcinoma', *Neoplasia*, 19: 165-74.
- Ricciotti, E., and G. A. Fitzgerald. 2011. 'Prostaglandins and inflammation', *Arterioscler Thromb Vasc Biol*, 31: 986-1000.
- Saadi, A., N. B. Shannon, P. Lao-Sirieix, M. O'Donovan, E. Walker, N. J. Clemons, J. S. Hardwick, C. Zhang, M. Das, V. Save, M. Novelli, F. Balkwill, and R. C. Fitzgerald. 2010. 'Stromal genes

discriminate preinvasive from invasive disease, predict outcome, and highlight inflammatory pathways in digestive cancers', *Proc Natl Acad Sci U S A*, 107: 2177-82.

Supek, F., M. Bosnjak, N. Skunca, and T. Smuc. 2011. 'REVIGO summarizes and visualizes long lists of gene ontology terms', *PLoS One*, 6: e21800.

Yakoub, D., H. C. Keun, R. Goldin, and G. B. Hanna. 2010. 'Metabolic profiling detects field effects in nondysplastic tissue from esophageal cancer patients', *Cancer Res*, 70: 9129-36.

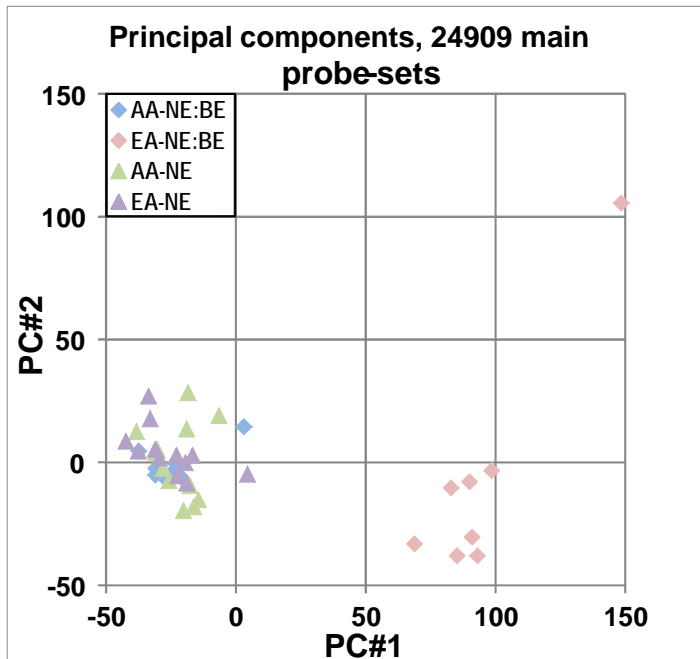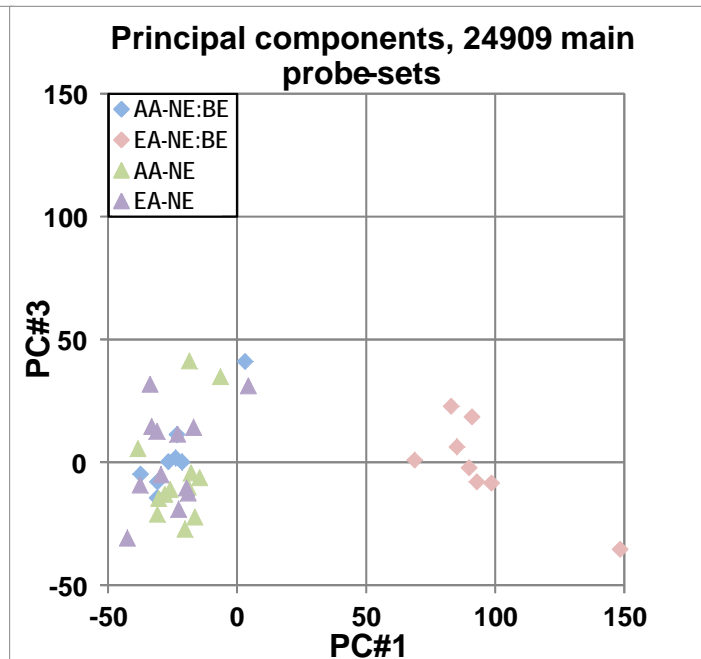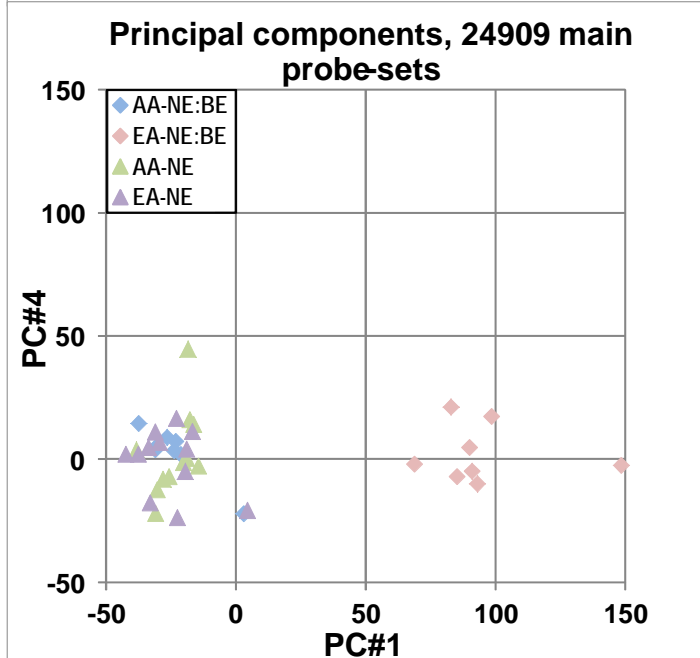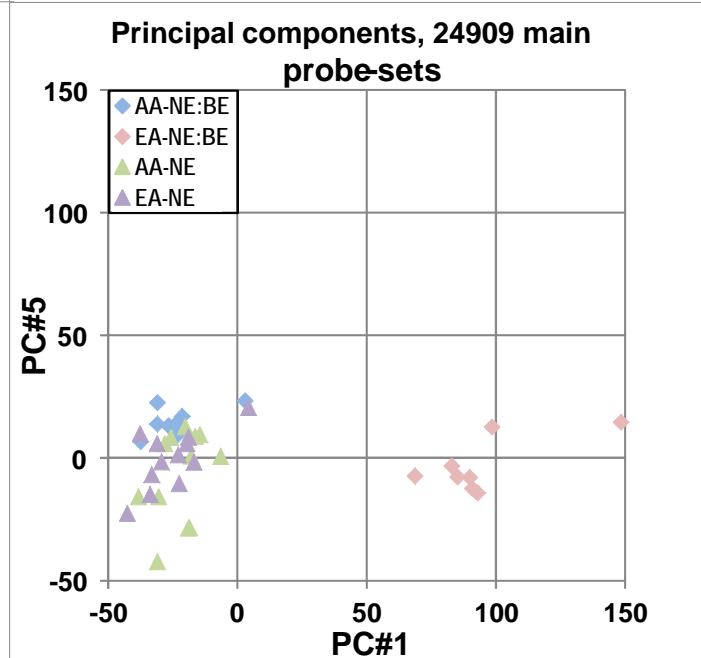

INSERT 1: Principal component analysis showed that EA-NE:BE individuals were distinct. PCA was conducted across all 24,909 probesets using mean-normalized expression. The top five unsupervised PCA components are shown where components 2, 3, 4 and 5 have been compared to the most variable component. In each case EA-NE:BE group form a distinct cluster compared to the other sample 3 groups, but chiefly through the PC#1 component.

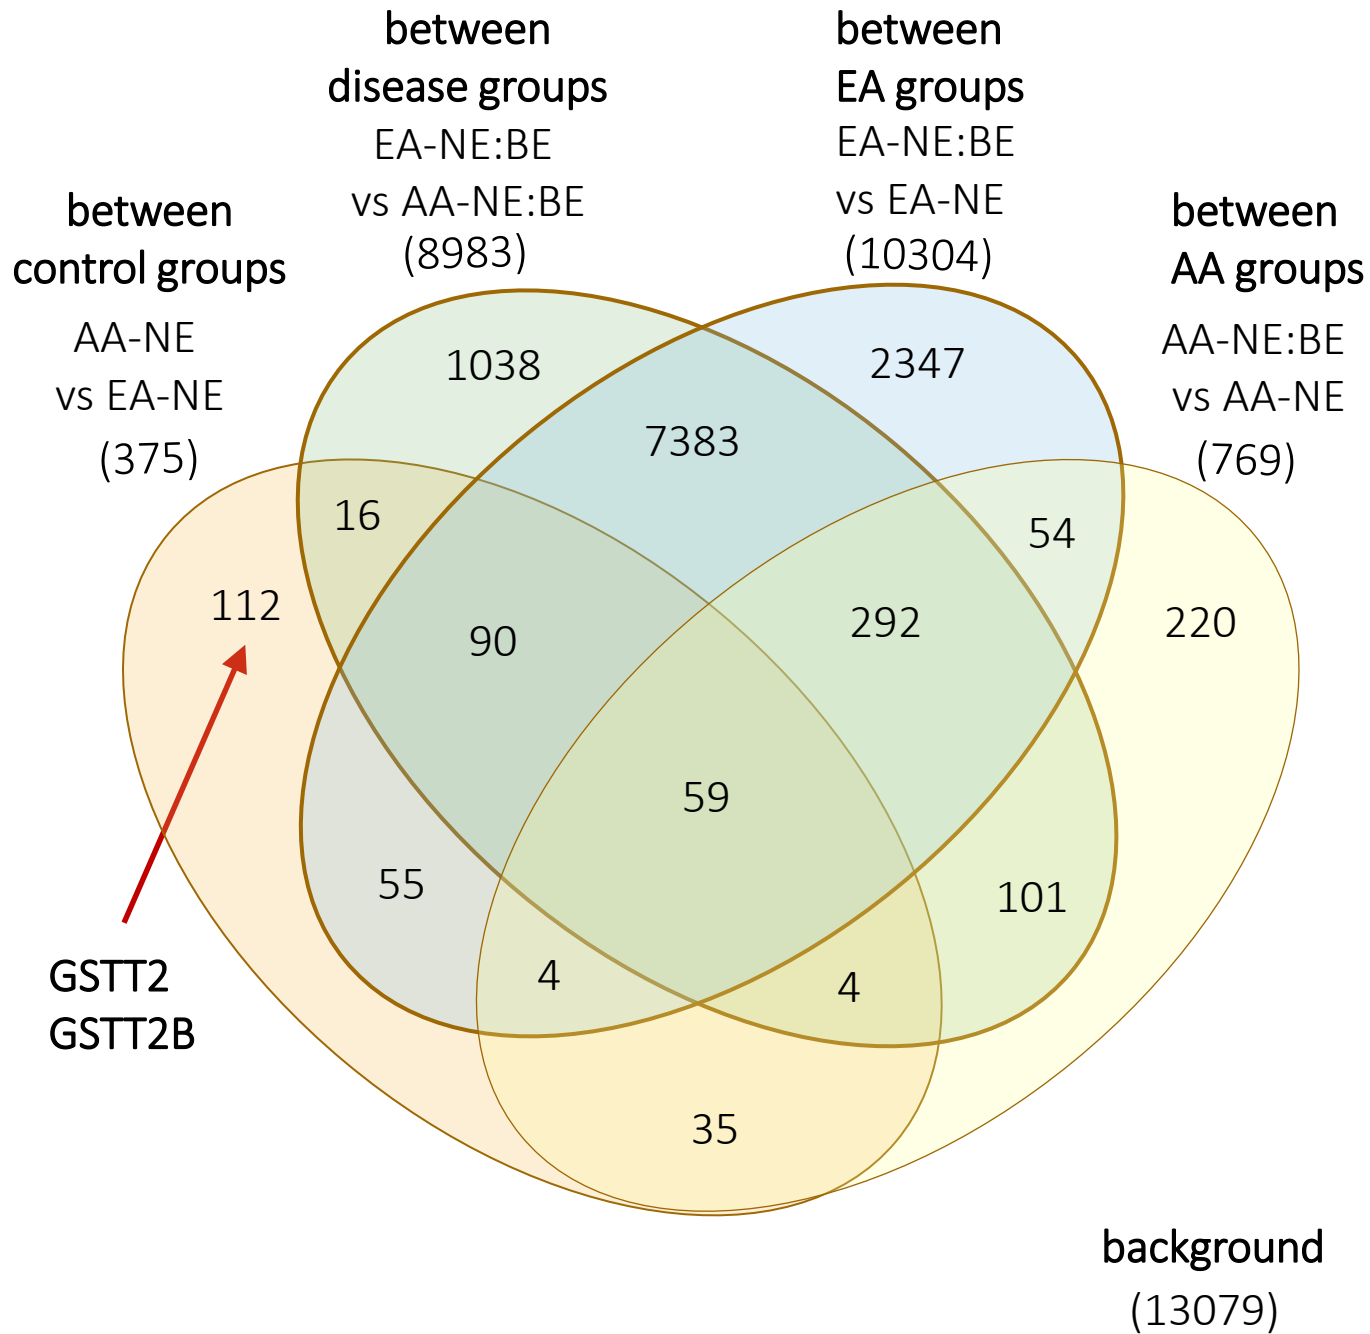

**INSERT 2: Paired between-group ANOVA shows that the EA-NE:BE is a distinct group.** A breakdown of transcript numbers across the 4 between-group comparisons we conducted, with one-way ANOVA with Fisher's LDS ( $P > 0.01$ ) for; AA-NE vs EA-NE, EA-NE:BE vs AA-NE:BE, EA-NE:BE vs EA-NE, & AA-NE:BE vs AA-NE. Results show that 48.5% (24,909-13,079=11,830) of transcripts showed differences for one or more of the four comparisons, with 96.9% (11,463) involving the EA-NE:BE disease group. 64.4% (7,383) of these were common to population (EA-NE:BE vs EA-NE) and disease (EA-NE:BE vs AA-NE:BE) comparisons involving this group. Venn diagram was produced with InteractiVenn (Heberle et al. 2015).

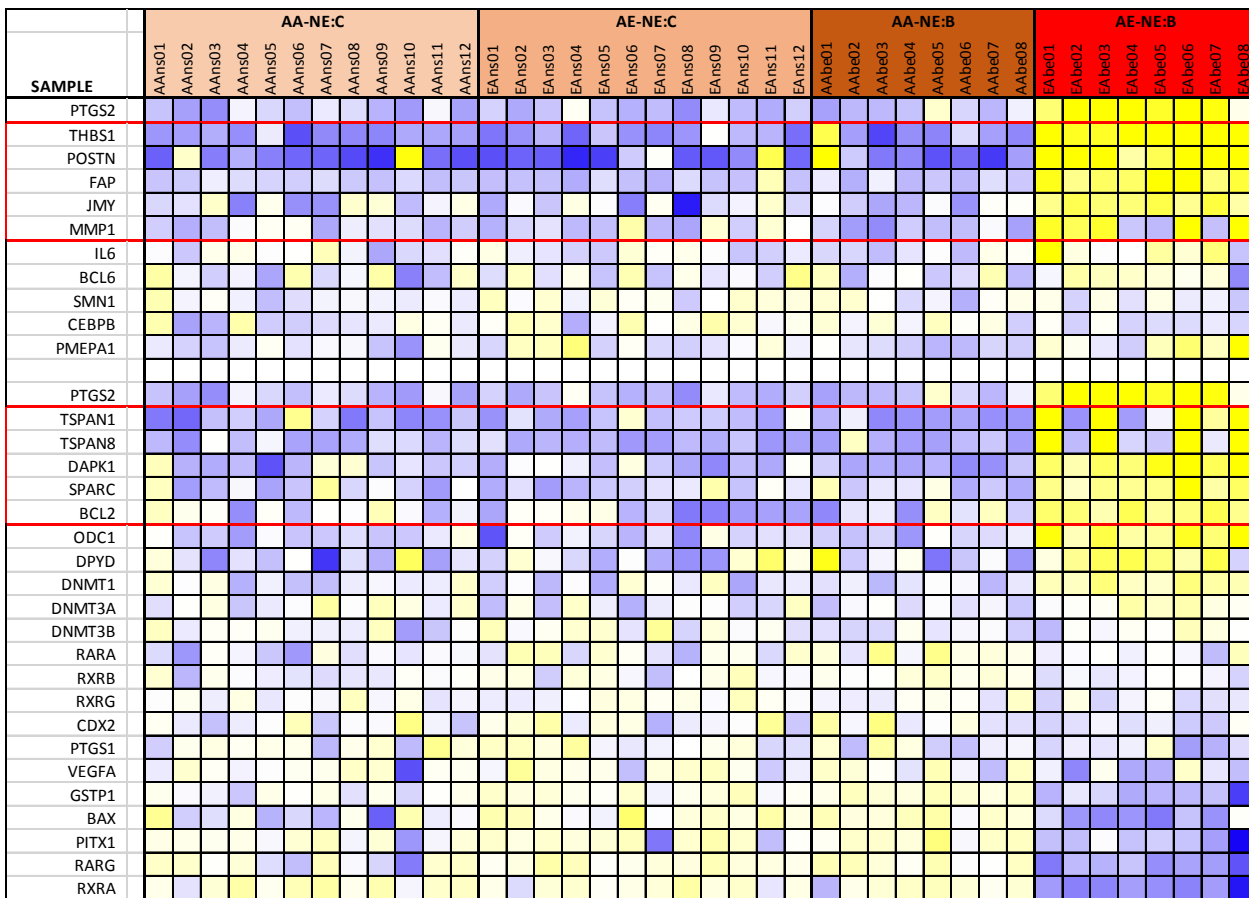

EAC stroma-related genes from Saadi *et al.*, 2010

Field-effect related genes from Brabender *et al.*, 2005

heatmap color key

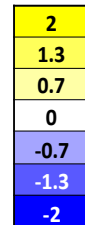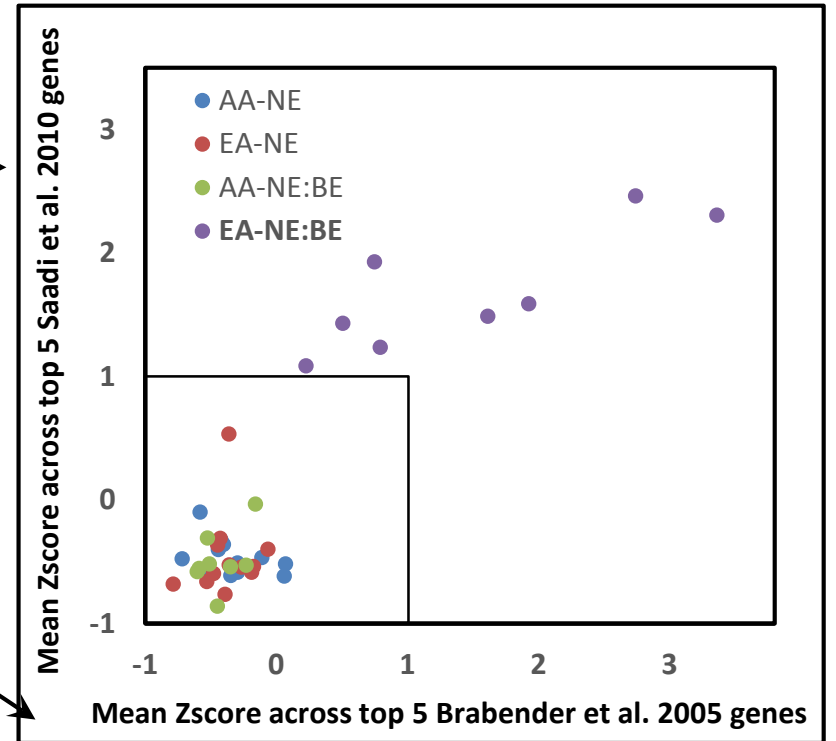

**INSERT 3: Analysis of previously identified genes differentially expressed in EAC squamous.** In contrast to the 5 genes identified in AA-NE vs EA-NE (Supplementary Table S2), we show expression differences for genes previously reported as associated with an EAC-related tissue field-effect, are over-expressed in EA-NE:BE. Log<sub>2</sub> expression values for genes reported by Brabender et al., 2005 and Saadi et al., 2010 were mean normalized to generate sample-group orientated (supervised) heat-maps using our Human Gene ST 2.1 expression data. Combining the most overexpressed of these genes from each study spatially delineated the 8 EA-NE:BE samples from the other 32 squamous samples. **Insert Table 1** shows the associated ANOVA *P* values and fold change ratios, relative to AE-NE:BE, as well as within-gene permutation-based *P* values.



**Insert Table 1.** Genes identified by Saadi et al., 2010 and Brabender et al., 2005 to be associated with an EAC progression field effect

| Symbol                                                                                                                 | Gene Name                                                                             | Entrez Gene | ANOVA P-value* |                      |                   |                   | Fold change^  |                     |                  |                  |
|------------------------------------------------------------------------------------------------------------------------|---------------------------------------------------------------------------------------|-------------|----------------|----------------------|-------------------|-------------------|---------------|---------------------|------------------|------------------|
|                                                                                                                        |                                                                                       |             | AA-NE vs EA-NE | EA-NE:BE vs AA-NE:BE | AA-NE:BE vs AA-NE | EA-NE:BE vs EA-NE | AA-NE / EA-NE | EA-NE:BE / AA-NE:BE | AA-NE:BE / AA-NE | EA-NE:BE / EA-NE |
|                                                                                                                        |                                                                                       |             |                |                      |                   |                   |               |                     |                  |                  |
| <b>Saadi et al 2010 - genes discriminating stroma of BE from stroma of EAC</b>                                         |                                                                                       |             |                |                      |                   |                   |               |                     |                  |                  |
| PTGS2                                                                                                                  | prostaglandin-endoperoxide synthase 2 (prostaglandin G/H synthase and cyclooxygenase) | 5743        | 0.99112        | 2.93E-11             | 0.6219            | 6.99E-13          | 1.00          | 4.47                | 1.07             | 4.81             |
| THBS1                                                                                                                  | thrombospondin 1                                                                      | 7057        | 0.87363        | 1.73E-13             | 0.4444            | 2.88E-15          | 0.97          | 11.52               | 1.16             | 13.03            |
| POSTN                                                                                                                  | periostin, osteoblast specific factor                                                 | 10631       | 0.85933        | 8.95E-05             | 0.4118            | 1.20E-06          | 1.07          | 8.71                | 1.45             | 13.58            |
| FAP                                                                                                                    | fibroblast activation protein, alpha                                                  | 2191        | 0.89871        | 3.38E-14             | 0.8909            | 2.41E-15          | 1.01          | 3.83                | 0.99             | 3.82             |
| JMY                                                                                                                    | junction mediating and regulatory protein, p53 cofactor                               | 133746      | 0.51382        | 1.19E-06             | 0.6321            | 1.56E-07          | 1.10          | 2.68                | 0.93             | 2.73             |
| MMP1                                                                                                                   | matrix metalloproteinase 1 (interstitial collagenase)                                 | 4312        | 0.78121        | 1.25E-04             | 0.5744            | 4.12E-04          | 0.93          | 3.61                | 0.86             | 2.89             |
| IL6                                                                                                                    | interleukin 6 (interferon, beta 2)                                                    | 3569        | 0.79878        | 0.0024               | 0.4933            | 0.0036            | 1.03          | 1.63                | 0.91             | 1.53             |
| BCL6                                                                                                                   | B-cell CLL/lymphoma 6                                                                 | 604         | 0.69507        | 0.2937               | 0.8822            | 0.5105            | 0.95          | 1.20                | 0.98             | 1.11             |
| SMN1                                                                                                                   | survival of motor neuron 1, telomeric                                                 | 6606        | 0.05156        | 0.5330               | 0.5619            | 0.0648            | 0.86          | 0.94                | 1.05             | 0.85             |
| CEBPB                                                                                                                  | CCAAT/enhancer binding protein (C/EBP), beta                                          | 1051        | 0.04566        | 0.0776               | 0.1691            | 0.0198            | 0.81          | 1.25                | 1.17             | 0.76             |
| <b>Brabender et al 2005 - genes discriminating squamous of non-disease subjects from squamous of patients with EAC</b> |                                                                                       |             |                |                      |                   |                   |               |                     |                  |                  |
| PTGS2                                                                                                                  | prostaglandin-endoperoxide synthase 2 (prostaglandin G/H synthase and cyclooxygenase) | 5743        | 0.99112        | 2.93E-11             | 0.6219            | 6.99E-13          | 1.00          | 4.47                | 1.07             | 4.81             |
| TSPAN1                                                                                                                 | tetraspanin 1                                                                         | 10103       | 0.76880        | 8.07E-05             | 0.8489            | 8.90E-05          | 0.89          | 7.89                | 0.92             | 6.50             |
| TSPAN8                                                                                                                 | tetraspanin 8                                                                         | 7103        | 0.77094        | 2.06E-04             | 0.9217            | 3.89E-05          | 1.11          | 6.43                | 0.96             | 6.87             |
| DAPK1                                                                                                                  | death-associated protein kinase 1                                                     | 1612        | 0.93683        | 9.81E-10             | 0.2223            | 3.06E-09          | 1.01          | 5.17                | 0.80             | 4.17             |
| SPARC                                                                                                                  | secreted protein, acidic, cysteine-rich (osteonectin)                                 | 6678        | 0.75082        | 3.06E-06             | 0.9854            | 2.38E-07          | 1.04          | 2.35                | 1.00             | 2.45             |
| BCL2                                                                                                                   | B-cell CLL/lymphoma 2                                                                 | 596         | 0.03985        | 1.54E-06             | 0.4506            | 8.91E-09          | 1.30          | 2.40                | 0.90             | 2.81             |
| ODC1                                                                                                                   | ornithine decarboxylase 1                                                             | 4953        | 0.70043        | 4.00E-09             | 0.8569            | 2.93E-10          | 1.05          | 3.29                | 0.97             | 3.37             |
| DPYD                                                                                                                   | dihydropyrimidine dehydrogenase                                                       | 1806        | 0.54122        | 0.0114               | 0.5403            | 0.0051            | 0.89          | 1.90                | 1.15             | 1.93             |
| DNMT1                                                                                                                  | DNA (cytosine-5-)-methyltransferase 1                                                 | 1786        | 0.66680        | 1.16E-06             | 0.3490            | 1.17E-06          | 1.04          | 1.87                | 0.91             | 1.77             |
| DNMT3A                                                                                                                 | DNA (cytosine-5-)-methyltransferase 3 alpha                                           | 1788        | 0.09592        | 0.0046               | 0.0528            | 0.0075            | 1.16          | 1.39                | 0.82             | 1.33             |
| DNMT3B                                                                                                                 | DNA (cytosine-5-)-methyltransferase 3 beta                                            | 1789        | 0.15808        | 0.1548               | 0.3355            | 0.5048            | 0.88          | 1.17                | 0.91             | 0.93             |
| RARA                                                                                                                   | retinoic acid receptor, alpha                                                         | 5914        | 0.06717        | 0.0570               | 0.0021            | 0.6053            | 0.83          | 0.78                | 1.46             | 0.94             |
| RXRB                                                                                                                   | retinoid X receptor, beta                                                             | 6257        | 0.15916        | 0.0080               | 0.0117            | 0.0966            | 0.91          | 0.80                | 1.21             | 0.88             |
| RXRG                                                                                                                   | retinoid X receptor, gamma                                                            | 6258        | 0.54726        | 0.1008               | 0.9431            | 0.0188            | 0.97          | 0.89                | 1.00             | 0.85             |
| CDX2                                                                                                                   | caudal type homeobox 2                                                                | 1045        | 0.51735        | 0.0622               | 0.3408            | 0.0926            | 0.93          | 0.77                | 1.13             | 0.81             |
| PTGS1                                                                                                                  | prostaglandin-endoperoxide synthase 1 (prostaglandin G/H synthase and cyclooxygenase) | 5742        | 0.84660        | 0.2682               | 0.4843            | 0.0416            | 0.98          | 0.86                | 0.92             | 0.77             |
| VEGFA                                                                                                                  | vascular endothelial growth factor A                                                  | 7422        | 0.50625        | 0.0433               | 0.5319            | 0.0297            | 0.92          | 0.73                | 1.09             | 0.74             |
| GSTP1                                                                                                                  | glutathione S-transferase pi 1                                                        | 2950        | 0.02690        | 2.09E-09             | 0.0018            | 1.08E-08          | 0.85          | 0.51                | 1.30             | 0.56             |
| BAX                                                                                                                    | BCL2-associated X protein                                                             | 581         | 0.00723        | 2.23E-05             | 0.0109            | 8.18E-06          | 0.71          | 0.49                | 1.43             | 0.50             |
| PITX1                                                                                                                  | paired-like homeodomain 1                                                             | 5307        | 0.74656        | 1.38E-04             | 0.2420            | 5.80E-04          | 0.95          | 0.45                | 1.22             | 0.53             |
| RARG                                                                                                                   | retinoic acid receptor, gamma                                                         | 5916        | 0.06468        | 9.99E-08             | 0.0672            | 2.55E-08          | 0.83          | 0.46                | 1.22             | 0.47             |
| RXRA                                                                                                                   | retinoid X receptor, alpha                                                            | 6256        | 0.35088        | 2.86E-09             | 0.4109            | 3.42E-10          | 1.09          | 0.43                | 0.92             | 0.43             |

\*P-value from ANOVA comparison of AA-NE and EA-NE normalized log2 Affy ST 2.1 expression data, with 4 group correction but not multiple testing correction

^Mean group fold changes (FC) were calculated and presented in non-log values

## EA-NE:BE vs AA-NE:BE only

|                                     |                 |
|-------------------------------------|-----------------|
| type I interferon signaling pathway | immune response |
|-------------------------------------|-----------------|

## EA-NE:BE vs AA-NE:BE and EA-NE:BE vs EA-NE

|                                    |                          |                                        |                                          |                                                         |                                                 |
|------------------------------------|--------------------------|----------------------------------------|------------------------------------------|---------------------------------------------------------|-------------------------------------------------|
| extracellular matrix organization  |                          | positive regulation of GTPase activity |                                          |                                                         |                                                 |
| extracellular matrix organization  |                          | positive regulation of GTPase activity | positive regulation of cell migration    | regulation of small GTPase mediated signal transduction | positive regulation of phosphatid ylinositol... |
|                                    |                          |                                        |                                          | integrin-mediated signalin...                           | positive regulation of...                       |
| extracellular matrix organization  |                          | B cell receptor signaling pathway      | cellular response to DNA damage stimulus | positive regulation of endothelia...                    | platelet-derived growt...                       |
|                                    |                          |                                        |                                          | angiogenesis                                            | protein...                                      |
| platelet degranulation             | cilium assembly          | cell adhesion                          | angiogenesis                             | forebra in develo pment                                 | protein phosphorylation                         |
| protein localization to centrosome | centroso me duplicatio n |                                        |                                          |                                                         |                                                 |
| cell-substrate junction assembly   | actin...                 | cell adhesion                          | regulati on of cell shape                | smooth muscle cell differe ntiati...                    | RNA processing                                  |

## EA-NE:BE vs EA-NE only

|                          |            |
|--------------------------|------------|
| mitotic nuclear division | DNA repair |
|--------------------------|------------|

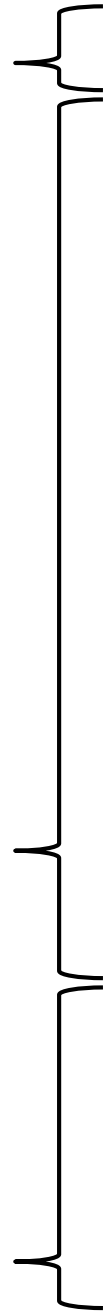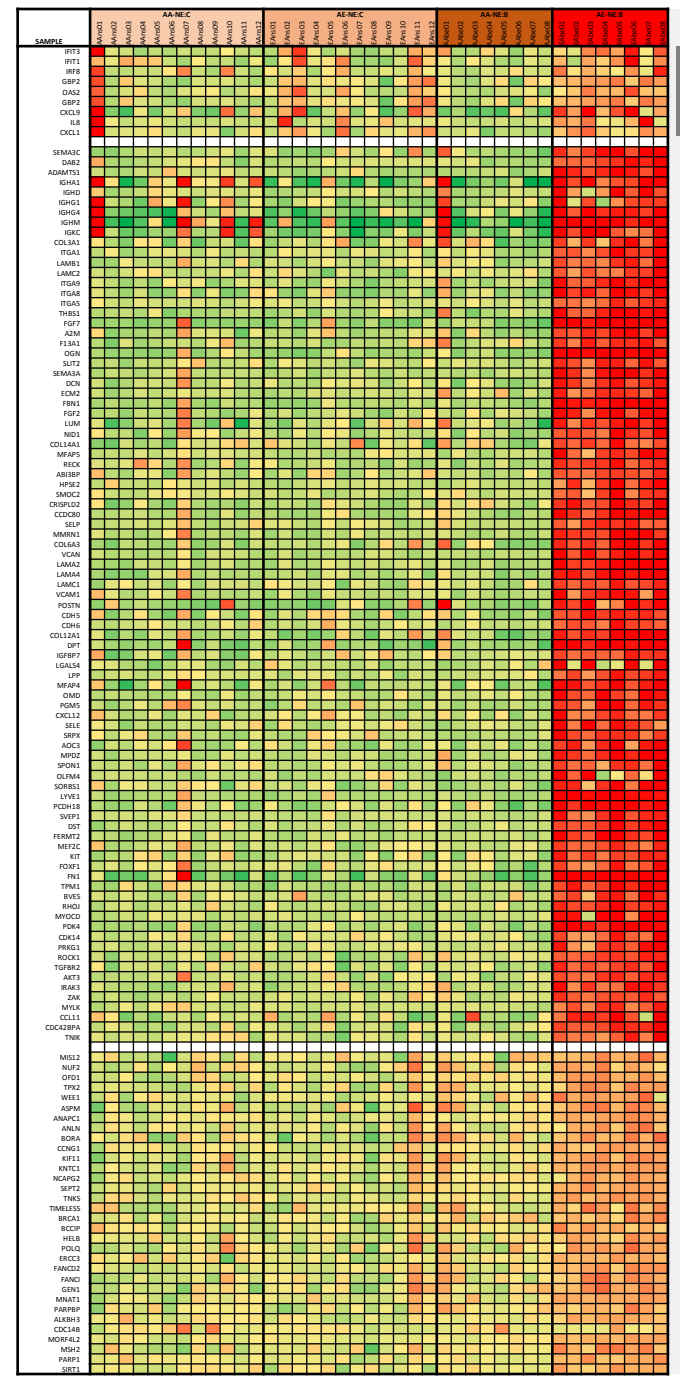

Interferon/immune

GTPase activity

Extracellular matrix

Cell adhesion

Angiogenesis

RNA/protein processing

Proliferation & DNA repair

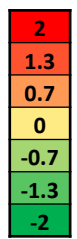

**INSERT 4: Gene ontologies over-represented in the EA-NE:BE sample group.** The most upregulated transcripts (ANOVA  $P < 0.01$  and FC  $> 2$ -fold) common to both EA-NE:BE vs AA-NE:BE and EA-NE:BE vs EA-NE comparisons were interrogated via the DAVID web-application to identify the most over-represented GO ontologies (Benjamini adjusted  $P < 0.05$ ), visualized using REVIGO (Supek et al 2011). As expected, based on the high number of shared genes (**Insert 2**) the majority of ontologies were shared between the two comparisons, but with immune-related gene groups differential between the two disease populations, and proliferation/DNA damage ontologies more highly expressed in BE/EAC squamous compared to controls from the same race. We then used whole cohort mean normalized log<sub>2</sub> expression to generate a heat-map of the differentially expressed from each of the significant gene ontologies.
